# Supplementary material for: SN2 regioselectivity in the esterification of 5- and 7-membered azacycloalkane quaternary salts: a DFT study to reveal the transition state ring conformation prevailing over the ground state ring strain
Source: Royal Society of Chemistry journal article supplement (doi:10.1039/c4ob00695j), 2014-01-01
Supplement: c4ob00695j2.pdf [file c4ob00695j2.pdf]

## Supporting Information

### **S<sub>N</sub>2 Regioselectivity in the Esterification of 5- and 7-Membered Azacycloalkane Quaternary Salts: A DFT Study to Reveal the Transition State Ring Conformation Prevailing over the Ground State Ring Strain**

*Akihiro Kimura, Susumu Kawauchi,\* Takuya Yamamoto and Yasuyuki Tezuka\**

Department of Organic and Polymeric Materials, Tokyo Institute of Technology

O-okayama, Meguro-ku, Tokyo 152-8552, Japan

#### **Contents**

**Figure S1.** <sup>1</sup>H NMR spectra (300 MHz) of the reaction products of poly(THF) having *N*-phenylpyrrolidinium salt end groups (**1**) with (top) benzoate, (middle) *p*-methoxybenzoate, and (bottom) *p*-nitrobenzoate benzoate anions. (CDCl<sub>3</sub>, 25 °C) --- S3

**Figure S2.** <sup>1</sup>H NMR spectra (300 MHz) of the reaction products of poly(THF) having *N*-phenylazepanium salt end groups (**2**) with (top) benzoate, (middle) *p*-methoxybenzoate, and (bottom) *p*-nitrobenzoate benzoate anions. (CDCl<sub>3</sub>, 25 °C) --- S4

**Figure S3.** DFT-optimized ground state (**top**), ring-emitting, (**middle**), and ring-opening, (**bottom**), transition state structures in the esterification of *N*-phenylazacyclohexane quaternary salt by benzoate, and the Newman projections along the skeletal C-C bonds. The benzoate anion is omitted for the sake of clarity. The projections of N1-C2, C2-C3 and C6-N1 bonds are not shown as these are involved in the esterification reactions. --- S5

**Figure S4.** Skeletal conformation of (**top**) DFT-optimized 5-membered thiocyclopentane ground state, its ring-opening transition state, and with a hypothetical atom, and cyclohexane, and (**bottom**)

DFT-optimized 7-membered thiocycloheptane ground state, its ring-opening transition state, and with a hypothetical atom, and cyclooctane. --- S6

Electronic energy calculated by 6-311++G(d, p) and 6-311++G(2d, 2p) basis set ---S7

Energies, Imaginary Frequencies, and Optimized Geometries – CAM-B3LYP/6-31+G(d) --- S8

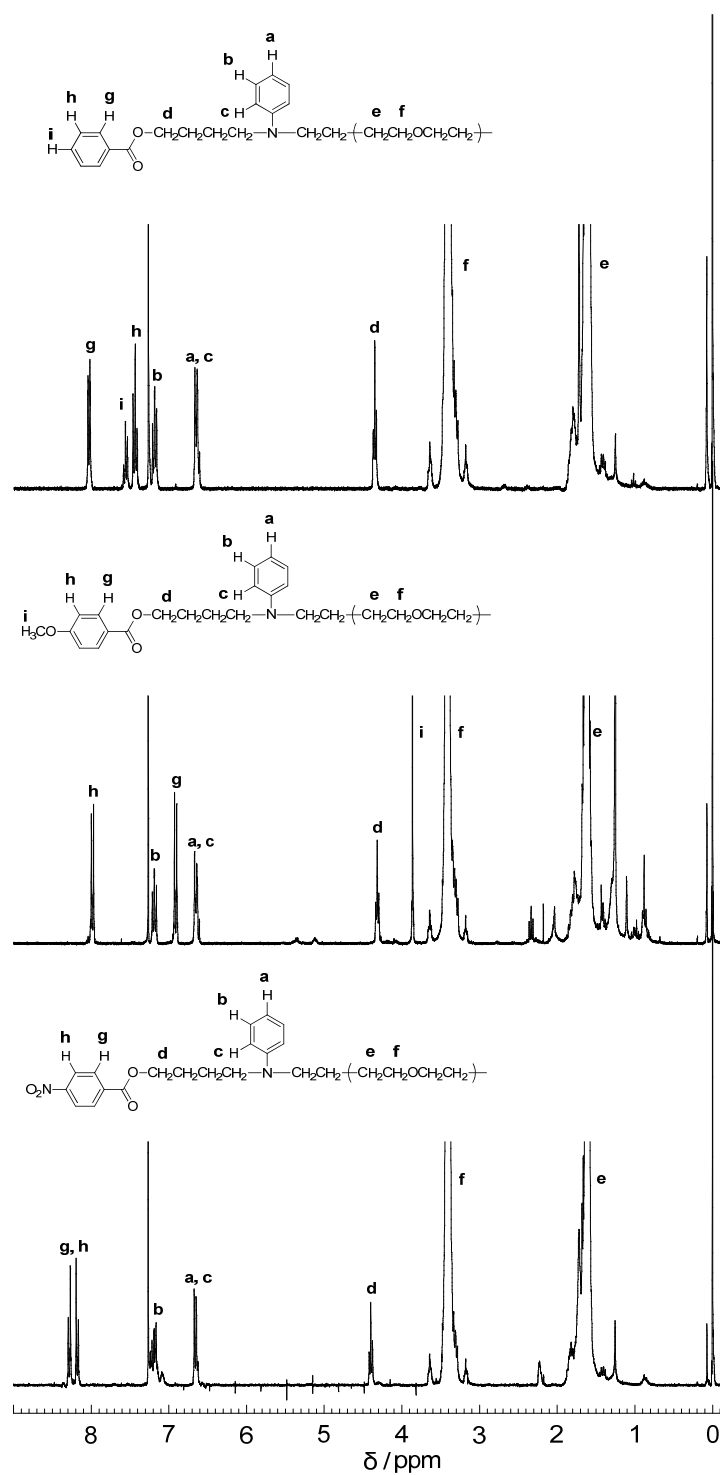

**Figure S1.**  $^1\text{H}$  NMR spectra (300 MHz) of the reaction products of poly(THF) having *N*-phenylpyrrolidinium salt end groups (**1**) with (top) benzoate, (middle) *p*-methoxybenzoate, and (bottom) *p*-nitrobenzoate benzoate anions. ( $\text{CDCl}_3$ , 25  $^\circ\text{C}$ )

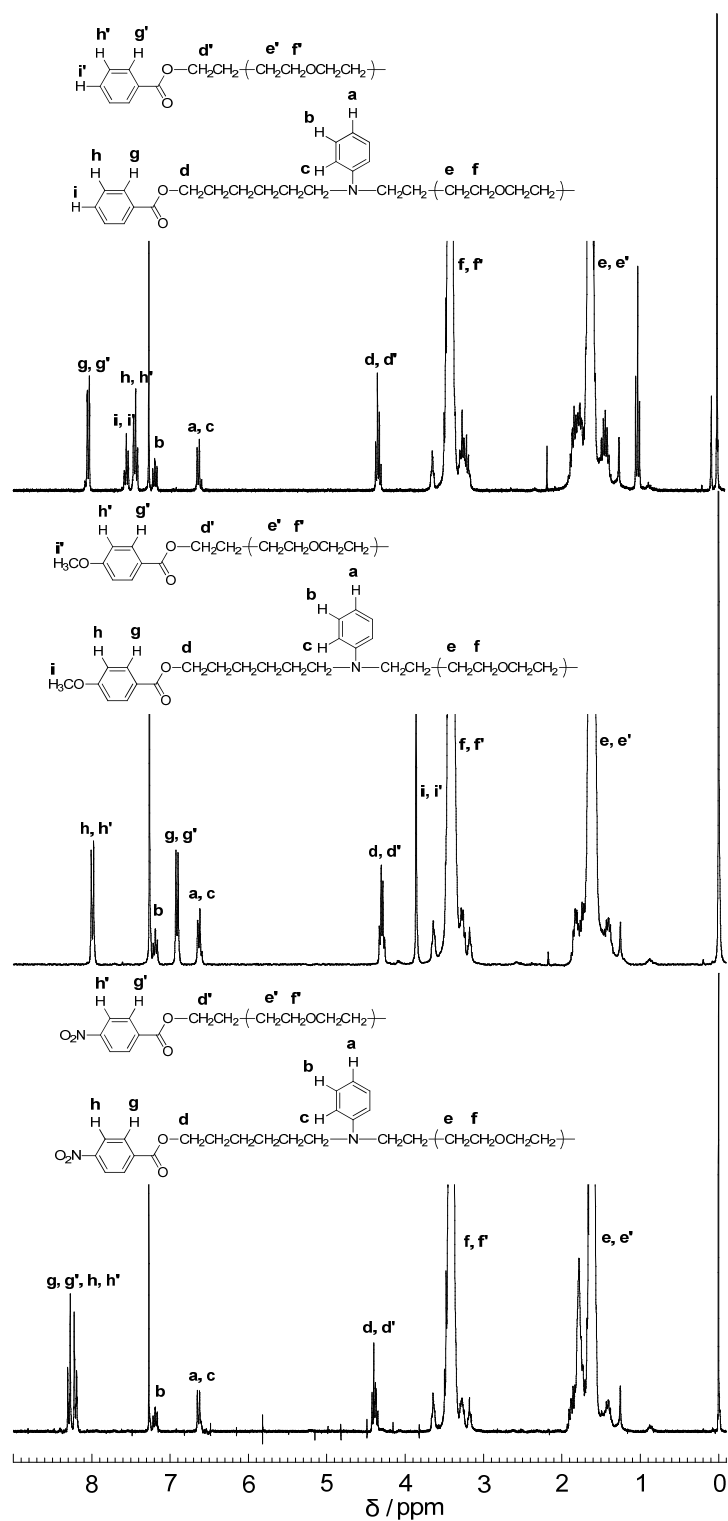

**Figure S2.**  $^1\text{H}$  NMR spectra (300 MHz) of the reaction products of poly(THF) having *N*-phenylazepanium salt end groups (**2**) with (top) benzoate, (middle) *p*-methoxybenzoate, and (bottom) *p*-nitrobenzoate benzoate anions. ( $\text{CDCl}_3$ , 25  $^\circ\text{C}$ )

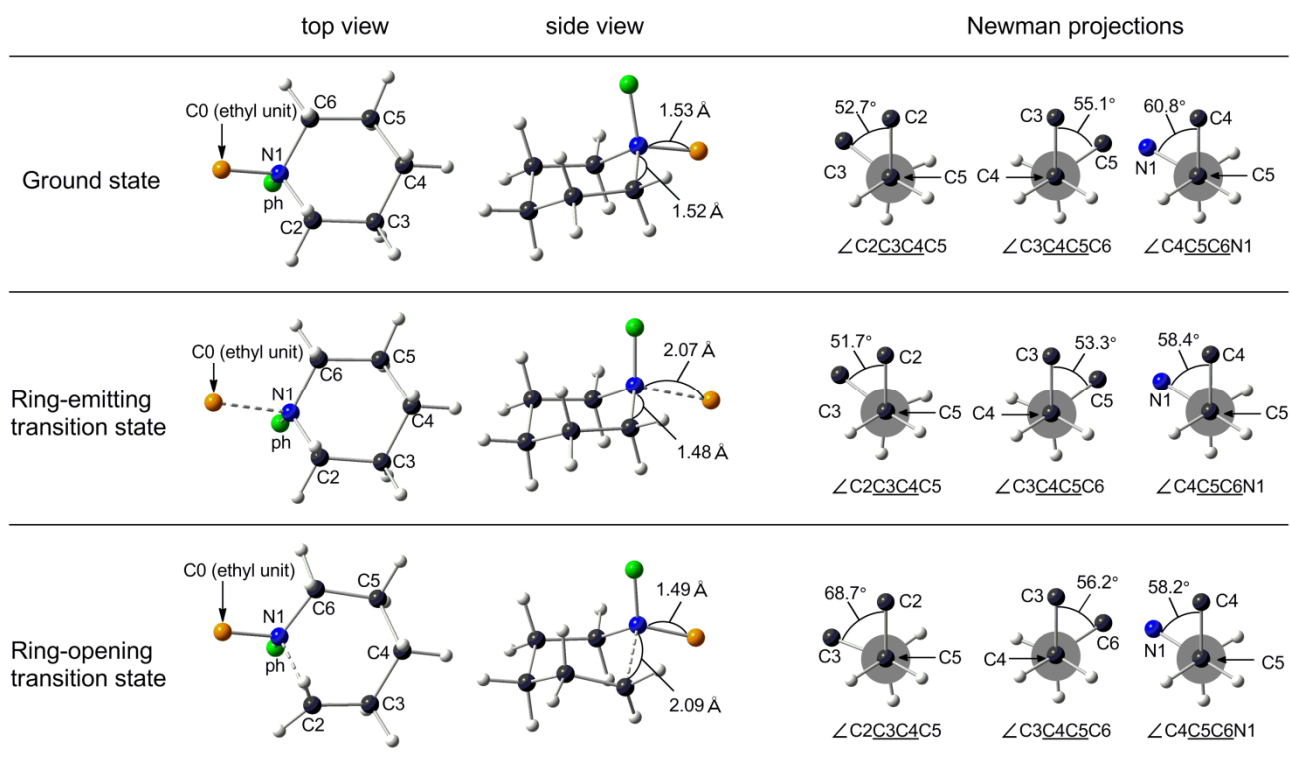

**Figure S3.** DFT-optimized ground state (**top**), ring-emitting, (**middle**), and ring-opening, (**bottom**), transition state structures in the esterification of *N*-phenylazacyclohexane quaternary salt by benzoate, and the Newman projections along the skeletal C-C bonds. The benzoate anion is omitted for the sake of clarity. The projections of N1-C2, C2-C3 and C6-N1 bonds are not shown as these are involved in the esterification reactions.

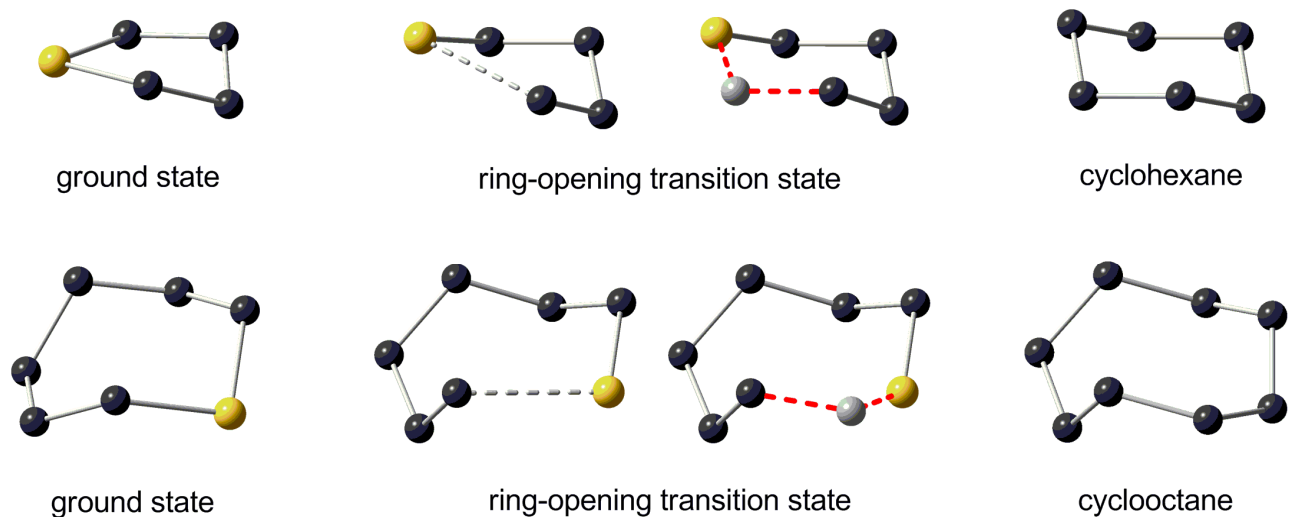

**Figure S4.** Skeletal conformation of **(top)** DFT-optimized 5-membered thiocyclopentane ground state, its ring-opening transition state, and with a hypothetical atom, and cyclohexane, and **(bottom)** DFT-optimized 7-membered thiocycloheptane ground state, its ring-opening transition state, and with a hypothetical atom, and cyclooctane

## Electronic energy calculated by 6-311++G(d, p) and 6-311++G(2d, 2p) basis set

### Method: B3LYP

|                     | 6-311++G(d, p) | 6-311++G(2d, 2p) |
|---------------------|----------------|------------------|
| I/benzoate(GS)      | -943.1424245   | -943.3617057     |
| I/benzoate(TS, em)  | -943.1089659   | -943.3284778     |
| I/benzoate(TS, op)  | -943.1131464   | -943.3328837     |
| II/benzoate(GS)     | -1021.764779   | -1022.001067     |
| II/benzoate(TS, em) | -1021.733870   | -1021.970571     |
| II/benzoate(TS, op) | -1021.734384   | -1021.971234     |

### Method: CAM-B3LYP

|                     | 6-311++G(d, p) | 6-311++G(2d, 2p) |
|---------------------|----------------|------------------|
| I/benzoate(GS)      | -942.6324256   | -942.8562696     |
| I/benzoate(TS, em)  | -942.5927958   | -942.8169545     |
| I/benzoate(TS, op)  | -942.5970337   | -942.8214772     |
| II/benzoate(GS)     | -1021.206325   | -1021.447773     |
| II/benzoate(TS, em) | -1021.168757   | -1021.410680     |
| II/benzoate(TS, op) | -1021.169666   | -1021.411696     |

### Method: $\omega$ B97X-D

|                     | 6-311++G(d, p) | 6-311++G(2d, 2p) |
|---------------------|----------------|------------------|
| I/benzoate(GS)      | -942.8504070   | -943.0588185     |
| I/benzoate(TS, em)  | -942.8030722   | -943.0115670     |
| I/benzoate(TS, op)  | -942.8061669   | -943.0147696     |
| II/benzoate(GS)     | -1021.454060   | -1021.679174     |
| II/benzoate(TS, em) | -1021.410331   | -1021.635296     |
| II/benzoate(TS, op) | -1021.412874   | -1021.638004     |

### Method: M06-2X

|                     | 6-311++G(d, p) | 6-311++G(2d, 2p) |
|---------------------|----------------|------------------|
| I/benzoate(GS)      | -942.7246703   | -942.9672164     |
| I/benzoate(TS, em)  | -942.6786904   | -942.9211982     |
| I/benzoate(TS, op)  | -942.6819204   | -942.9243765     |
| II/benzoate(GS)     | -1021.306772   | -1021.569510     |
| II/benzoate(TS, em) | -1021.266133   | -1021.528538     |
| II/benzoate(TS, op) | -1021.267936   | -1021.530336     |

## Energies, Imaginary Frequencies, and Optimized Geometries

### Ground state of an *N*-phenylpyrrolidinium end group model and benzoate, I/benzoate (GS)

electronic energy = -942.599709 Hartree

sum of electronic and zero-point energies = -942.251050

sum of electronic and thermal energies = -942.222310

sum of electronic and thermal enthalpies = -942.221236

sum of electronic and thermal free energies = -942.318734

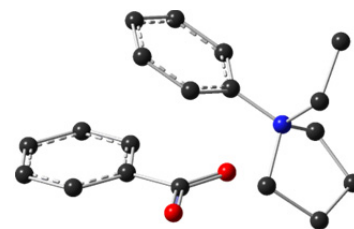

|   |             |             |             |
|---|-------------|-------------|-------------|
| N | 2.46258500  | -0.20390300 | 0.07793000  |
| C | 2.15048900  | -1.21385600 | -1.01226300 |
| C | 2.79099300  | -2.51281900 | -0.53546300 |
| C | 2.75416200  | -2.43213800 | 1.00754800  |
| C | 2.20574600  | -1.04031000 | 1.32952800  |
| H | 2.52002700  | -0.85200000 | -1.96959100 |
| H | 1.06121700  | -1.31622600 | -1.03457600 |
| H | 2.21854800  | -3.35898300 | -0.92038100 |
| H | 3.81414500  | -2.61932900 | -0.90484700 |
| H | 3.74628000  | -2.58645400 | 1.43824000  |
| H | 2.09110800  | -3.18491800 | 1.43849800  |
| H | 2.68377300  | -0.55867700 | 2.18137900  |
| H | 1.11905000  | -1.05987700 | 1.45487400  |
| C | 1.59908800  | 1.00495100  | 0.04594900  |
| C | 0.04296200  | 3.30900700  | 0.03055200  |
| C | 0.86569800  | 1.33054500  | -1.08706200 |
| C | 1.56935900  | 1.82702200  | 1.16924900  |
| C | 0.78828300  | 2.97667700  | 1.15883500  |
| C | 0.08604900  | 2.48527900  | -1.08792800 |
| H | 0.88022900  | 0.70409400  | -1.96868400 |
| H | 2.14011200  | 1.58357000  | 2.05787200  |
| H | 0.76227900  | 3.60964000  | 2.03978900  |
| H | -0.49028200 | 2.73254800  | -1.97345000 |
| H | -0.56906800 | 4.20522200  | 0.02547100  |
| H | 4.51076000  | -0.69896300 | 0.14959000  |
| C | 3.92594900  | 0.21491000  | 0.04810900  |
| H | 4.07927400  | 0.81237800  | 0.94733500  |
| C | 4.33971900  | 0.99181200  | -1.18671500 |



|   |             |             |             |
|---|-------------|-------------|-------------|
| H | 5.39040200  | 1.27001100  | -1.06541300 |
| H | 3.76141000  | 1.91058700  | -1.30659800 |
| H | 4.26190500  | 0.40122900  | -2.10238900 |
| C | -1.51611400 | -1.34044700 | 0.17385400  |
| O | -0.98349300 | -1.31635700 | 1.31580900  |
| O | -0.98970100 | -1.79824000 | -0.87634500 |
| C | -2.91982100 | -0.75843200 | 0.04949600  |
| C | -3.57912700 | -0.75182700 | -1.18146000 |
| C | -3.56948100 | -0.22508800 | 1.16461400  |
| C | -4.86196300 | -0.22252200 | -1.29813500 |
| H | -3.07058300 | -1.16846100 | -2.04424200 |
| C | -4.85225800 | 0.30557600  | 1.05364300  |
| H | -3.05369200 | -0.23343100 | 2.11884200  |
| C | -5.50238100 | 0.30816800  | -0.17946100 |
| H | -5.36368700 | -0.22459200 | -2.26197500 |
| H | -5.34633400 | 0.71685900  | 1.92968300  |
| H | -6.50353500 | 0.72082300  | -0.26798900 |

**Transition state of a ring-emitting reaction between an *N*-phenylpyrrolidinium end group model and benzoate, I/benzoate (TS, em)**

electronic energy = -942.560211 Hartree

sum of electronic and zero-point energies = -942.214035

sum of electronic and thermal energies = -942.185492

sum of electronic and thermal enthalpies = -942.184418

sum of electronic and thermal free energies = -942.280627

560.39i (cm<sup>-1</sup>)

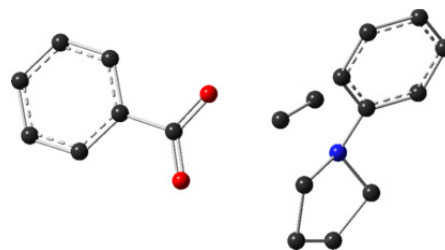

|   |            |             |             |
|---|------------|-------------|-------------|
| H | 5.53026500 | -3.41600300 | -0.44153100 |
| C | 4.88036700 | -2.54996500 | -0.36663000 |
| C | 3.20393200 | -0.30609300 | -0.17581100 |
| C | 3.97286200 | -2.25948400 | -1.38237500 |
| C | 4.94463900 | -1.71476400 | 0.74302300  |
| C | 4.11459800 | -0.60055600 | 0.84312600  |
| C | 3.14021500 | -1.14999400 | -1.29144100 |
| H | 3.90900100 | -2.89914100 | -2.25732100 |
| H | 5.64719700 | -1.92314800 | 1.54417100  |
| H | 4.19261500 | 0.03350200  | 1.71761000  |

|   |             |             |             |
|---|-------------|-------------|-------------|
| H | 2.44318600  | -0.94674800 | -2.09635400 |
| N | 2.30316800  | 0.80206200  | -0.07056700 |
| C | 2.01006800  | 1.50557100  | -1.35226900 |
| H | 1.26518800  | 0.94349200  | -1.91873200 |
| H | 2.92675700  | 1.55088400  | -1.94857500 |
| C | 1.51811500  | 2.91052500  | -0.96086800 |
| C | 1.73272200  | 3.01562300  | 0.56171000  |
| H | 0.78684600  | 2.89959500  | 1.09823800  |
| H | 2.16109200  | 3.97417500  | 0.86234700  |
| C | 2.67583300  | 1.86600300  | 0.89142400  |
| H | 3.72268200  | 2.15038700  | 0.72536300  |
| H | 2.57572800  | 1.50861500  | 1.91668700  |
| H | 2.09661700  | 3.66720400  | -1.49592600 |
| H | 0.46839500  | 3.05395500  | -1.22570200 |
| C | 0.44804400  | 0.02490200  | 0.43780500  |
| H | -0.00049100 | 0.96902900  | 0.17871000  |
| H | 0.59133100  | -0.70062900 | -0.34839800 |
| C | 0.67338700  | -0.37829400 | 1.86002000  |
| H | 0.43414900  | 0.43199400  | 2.55236100  |
| H | 1.70605700  | -0.69917600 | 2.02219700  |
| H | 0.03335200  | -1.23047800 | 2.09295400  |
| H | -4.53603600 | 1.75915400  | -0.50239600 |
| C | -4.81227500 | 0.72522100  | -0.32563100 |
| C | -5.48141400 | -1.93643100 | 0.13531700  |
| C | -3.81021200 | -0.19167000 | -0.00318000 |
| C | -6.13963200 | 0.31690800  | -0.41778600 |
| C | -6.47689300 | -1.01582300 | -0.18728100 |
| C | -4.15451500 | -1.52521200 | 0.22636200  |
| H | -6.91199900 | 1.03809100  | -0.66941700 |
| H | -7.51249300 | -1.33593500 | -0.25869400 |
| H | -3.37237800 | -2.23354100 | 0.47653000  |
| H | -5.73958200 | -2.97601700 | 0.31586900  |
| C | -2.37078900 | 0.26979000  | 0.09239400  |
| O | -2.10658800 | 1.47154700  | -0.11762700 |
| O | -1.51265700 | -0.63045200 | 0.39094100  |

**Transition state of a ring-opening reaction between an *N*-phenylpyrrolidinium end group model and benzoate, I/benzoate (TS, op)**

electronic energy = -942.564420 Hartree

sum of electronic and zero-point energies = -942.217837

sum of electronic and thermal energies = -942.189652

sum of electronic and thermal enthalpies = -942.188578

sum of electronic and thermal free energies = -942.283634

535.73i (cm<sup>-1</sup>)

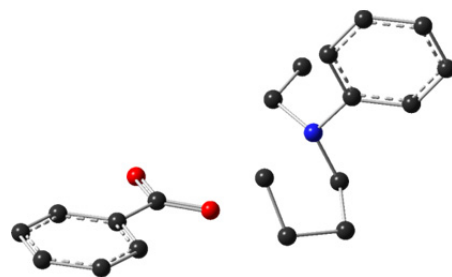

|   |             |             |             |
|---|-------------|-------------|-------------|
| H | 4.71363300  | 3.86122000  | -0.45019200 |
| C | 4.23513600  | 2.89110700  | -0.36108500 |
| C | 3.00107400  | 0.37652400  | -0.13103400 |
| C | 4.63947400  | 1.99266700  | 0.61847800  |
| C | 3.20126500  | 2.53167600  | -1.22259800 |
| C | 2.58614900  | 1.29143800  | -1.10648500 |
| C | 4.02972000  | 0.74456500  | 0.73691800  |
| H | 5.43975200  | 2.25455900  | 1.30394700  |
| H | 2.86165600  | 3.22218500  | -1.98847400 |
| H | 1.77148200  | 1.04547800  | -1.77855400 |
| H | 4.37449100  | 0.07672600  | 1.51539400  |
| N | 2.31239800  | -0.89452100 | -0.04120500 |
| C | 2.66651800  | -1.75873900 | 1.10440100  |
| H | 3.74227600  | -1.78523900 | 1.29064900  |
| H | 2.36243600  | -2.77450500 | 0.84001200  |
| C | 1.84634700  | -1.28345300 | 2.29030100  |
| C | 0.40172700  | -1.17308300 | 1.79516800  |
| H | -0.20086600 | -0.59478900 | 2.49716400  |
| H | -0.04894600 | -2.16701400 | 1.71251000  |
| C | 0.35787900  | -0.49109500 | 0.45188100  |
| H | 0.01408900  | -0.99949300 | -0.43518200 |
| H | 0.54073700  | 0.57045500  | 0.38683000  |
| H | 1.92548600  | -1.98207000 | 3.12808500  |
| H | 2.20200600  | -0.30883600 | 2.64074200  |
| C | 2.29488600  | -1.64415000 | -1.32712000 |
| H | 1.84228800  | -1.00703300 | -2.08725300 |
| H | 1.61976900  | -2.49152700 | -1.18361000 |
| C | -2.40934300 | -0.41974300 | -0.22784800 |

|   |             |             |             |
|---|-------------|-------------|-------------|
| O | -1.61046800 | 0.06358900  | 0.64701600  |
| O | -2.09047000 | -1.22599200 | -1.12476800 |
| C | -3.84887100 | 0.04391800  | -0.13691500 |
| C | -4.79183000 | -0.44097800 | -1.04503600 |
| C | -4.25174700 | 0.95314600  | 0.84323400  |
| C | -6.11813500 | -0.02473500 | -0.97572400 |
| H | -4.47076300 | -1.14684100 | -1.80350300 |
| C | -5.57766000 | 1.37139600  | 0.91496000  |
| H | -3.51603500 | 1.32747000  | 1.54653100  |
| C | -6.51385700 | 0.88310500  | 0.00522500  |
| H | -6.84405800 | -0.40819900 | -1.68704900 |
| H | -5.88132800 | 2.07906500  | 1.68112200  |
| H | -7.54864200 | 1.20898600  | 0.06058300  |
| C | 3.66605000  | -2.12236300 | -1.78415700 |
| H | 3.56416200  | -2.65752700 | -2.73302900 |
| H | 4.34929900  | -1.28258200 | -1.94089000 |
| H | 4.11909400  | -2.80683300 | -1.06076400 |

**Transition state of a ring-emitting reaction between an *N*-phenylpyrrolidinium end group model and *p*-methoxybenzoate, I/*p*-methoxybenzoate (TS, em)**

electronic energy = -1057.044432 Hartree

sum of electronic and zero-point energies = -1056.668857

sum of electronic and thermal energies = -1056.636828

sum of electronic and thermal enthalpies = -1056.635754

sum of electronic and thermal free energies = -1056.740069

562.20i (cm<sup>-1</sup>)

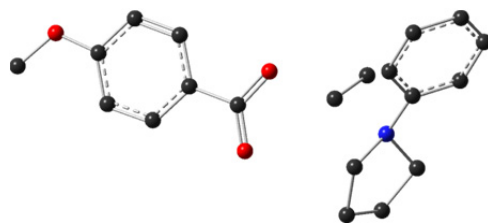

|   |            |             |             |
|---|------------|-------------|-------------|
| H | 6.19463400 | -3.55370300 | -0.46197600 |
| C | 5.57117000 | -2.66837900 | -0.38783100 |
| C | 3.96298800 | -0.37484900 | -0.19900200 |
| C | 4.66470000 | -2.35765300 | -1.39846400 |
| C | 5.66864800 | -1.82843100 | 0.71579600  |
| C | 4.87263600 | -0.68960000 | 0.81480700  |
| C | 3.86575000 | -1.22355500 | -1.30846200 |
| H | 4.57522100 | -3.00064400 | -2.26870800 |
| H | 6.37088000 | -2.05237400 | 1.51302000  |
| H | 4.97585700 | -0.05277900 | 1.68465400  |

|   |             |             |             |
|---|-------------|-------------|-------------|
| H | 3.16898600  | -1.00507900 | -2.10950200 |
| N | 3.09620700  | 0.76036600  | -0.09368700 |
| C | 2.81303300  | 1.46365100  | -1.37740300 |
| H | 2.05436700  | 0.91502900  | -1.93864700 |
| H | 3.72865000  | 1.48733800  | -1.97678100 |
| C | 2.35134200  | 2.87953200  | -0.99007100 |
| C | 2.60216100  | 2.99749000  | 0.52654400  |
| H | 1.66396300  | 2.92330500  | 1.08347300  |
| H | 3.07056200  | 3.94413300  | 0.80436100  |
| C | 3.51143000  | 1.82015400  | 0.85560900  |
| H | 4.56509300  | 2.06913800  | 0.67689600  |
| H | 3.41040200  | 1.47424100  | 1.88471000  |
| H | 2.92642500  | 3.62210700  | -1.54797900 |
| H | 1.29723400  | 3.03381100  | -1.23042300 |
| C | 1.22589400  | 0.05095000  | 0.43777200  |
| H | 0.80628200  | 1.00978600  | 0.18438400  |
| H | 1.32995800  | -0.68061300 | -0.34915500 |
| C | 1.45304900  | -0.36032200 | 1.85765300  |
| H | 1.24363800  | 0.45592400  | 2.55270100  |
| H | 2.47745200  | -0.71084500 | 2.01059200  |
| H | 0.79063900  | -1.19372100 | 2.09586100  |
| H | -3.70530800 | 1.99669100  | -0.37362600 |
| C | -4.01514900 | 0.97189800  | -0.19883800 |
| C | -4.78791800 | -1.65429300 | 0.25148500  |
| C | -3.04242900 | 0.01776200  | 0.08659300  |
| C | -5.36633900 | 0.63696900  | -0.26322800 |
| C | -5.75484800 | -0.68434800 | -0.03659200 |
| C | -3.44995700 | -1.30251500 | 0.31127900  |
| H | -6.09594400 | 1.40553200  | -0.48766900 |
| H | -2.70009300 | -2.05331900 | 0.53503400  |
| H | -5.10868000 | -2.67681500 | 0.42513700  |
| C | -1.58774300 | 0.41239400  | 0.14966700  |
| O | -1.27168400 | 1.60364200  | -0.05751800 |
| O | -0.76161500 | -0.52758700 | 0.42023800  |
| O | -7.04292900 | -1.12097900 | -0.07422900 |
| C | -8.06944500 | -0.18165400 | -0.35882600 |
| H | -7.93403300 | 0.26236600  | -1.35086000 |

|   |             |             |             |
|---|-------------|-------------|-------------|
| H | -9.00275400 | -0.74353800 | -0.33634500 |
| H | -8.10090500 | 0.60965100  | 0.39779100  |

**Transition state of a ring-opening reaction between an *N*-phenylpyrrolidinium end group model and *p*-methoxybenzoate, I/*p*-methoxybenzoate (TS, op)**

electronic energy = -1057.048630 Hartree

sum of electronic and zero-point energies = -1056.672592

sum of electronic and thermal energies = -1056.640956

sum of electronic and thermal enthalpies = -1056.639882

sum of electronic and thermal free energies = -1056.742893

537.88i (cm<sup>-1</sup>)

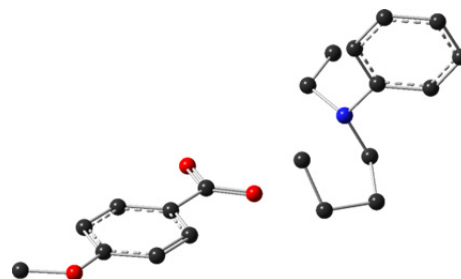

|   |            |             |             |
|---|------------|-------------|-------------|
| H | 5.34417900 | 3.98672900  | -0.48458000 |
| C | 4.90039800 | 3.00048700  | -0.39296500 |
| C | 3.75661500 | 0.44426000  | -0.15685600 |
| C | 5.34604500 | 2.11424200  | 0.57977300  |
| C | 3.87017700 | 2.60772200  | -1.24421400 |
| C | 3.29953500 | 1.34668400  | -1.12499100 |
| C | 4.78107800 | 0.84553400  | 0.70121000  |
| H | 6.14407400 | 2.40204000  | 1.25741500  |
| H | 3.49866000 | 3.28799100  | -2.00441100 |
| H | 2.48660100 | 1.07432300  | -1.78882900 |
| H | 5.15671800 | 0.18814400  | 1.47423800  |
| N | 3.11356700 | -0.85045800 | -0.06316100 |
| C | 3.51505100 | -1.70657200 | 1.07319200  |
| H | 4.59377200 | -1.69556400 | 1.24308400  |
| H | 3.24318600 | -2.73134700 | 0.80840600  |
| C | 2.69586200 | -1.26534000 | 2.27285500  |
| C | 1.24188900 | -1.20190400 | 1.79738400  |
| H | 0.62956200 | -0.64530500 | 2.50836800  |
| H | 0.82330800 | -2.21005100 | 1.71825100  |
| C | 1.15768500 | -0.51987100 | 0.45575300  |
| H | 0.81720900 | -1.03965600 | -0.42600300 |
| H | 1.29794500 | 0.54813300  | 0.39079800  |
| H | 2.81042800 | -1.96501800 | 3.10565100  |
| H | 3.02287500 | -0.28093200 | 2.62375900  |
| C | 3.10437100 | -1.59513500 | -1.35219800 |

|   |             |             |             |
|---|-------------|-------------|-------------|
| H | 2.61730700  | -0.97208900 | -2.10262700 |
| H | 2.46271600  | -2.46697900 | -1.20230600 |
| C | -1.62650500 | -0.58122200 | -0.16515500 |
| O | -0.83027800 | -0.03747800 | 0.67779200  |
| O | -1.28592400 | -1.39601100 | -1.04829300 |
| C | -3.07866300 | -0.18608200 | -0.05191200 |
| C | -4.02390000 | -0.73810300 | -0.91222000 |
| C | -3.51117000 | 0.73508200  | 0.90944300  |
| C | -5.37178200 | -0.39345200 | -0.83063200 |
| H | -3.69523500 | -1.45222200 | -1.65977400 |
| C | -4.84613200 | 1.09041000  | 1.00522100  |
| H | -2.78335000 | 1.17181700  | 1.58442200  |
| C | -5.78518600 | 0.52652000  | 0.13416900  |
| H | -6.07959600 | -0.84337600 | -1.51621700 |
| H | -5.18574200 | 1.80452100  | 1.74906600  |
| C | 4.48502800  | -2.02131400 | -1.83139500 |
| H | 4.38844700  | -2.55652100 | -2.78078700 |
| H | 5.13490200  | -1.15670300 | -1.99485300 |
| H | 4.97342000  | -2.69135800 | -1.11757100 |
| O | -7.07261600 | 0.93370700  | 0.30228700  |
| C | -8.07107100 | 0.39562700  | -0.55238900 |
| H | -9.00909100 | 0.85480300  | -0.24159800 |
| H | -7.87081500 | 0.64630300  | -1.59960800 |
| H | -8.14184700 | -0.69166100 | -0.44088300 |

**Transition state of a ring-emitting reaction between an *N*-phenylpyrrolidinium end group model and *p*-nitrobenzoate, *l/p*-nitrobenzoate (TS, em)**

electronic energy = -1147.012573 Hartree

sum of electronic and zero-point energies = -1146.664227

sum of electronic and thermal energies = -1146.632249

sum of electronic and thermal enthalpies = -1146.631175

sum of electronic and thermal free energies = -1146.737130

558.03i (cm<sup>-1</sup>)

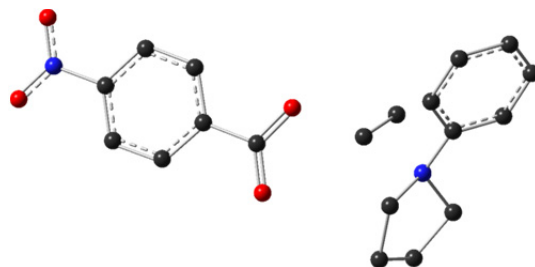

|   |            |             |             |
|---|------------|-------------|-------------|
| H | 6.22361200 | -3.76403000 | -0.44803500 |
| C | 5.65246800 | -2.84391000 | -0.37620600 |
| C | 4.17904400 | -0.46064100 | -0.19291400 |

|   |             |             |             |
|---|-------------|-------------|-------------|
| C | 4.77569600  | -2.47687700 | -1.39415200 |
| C | 5.78840000  | -2.01480300 | 0.73153600  |
| C | 5.05956800  | -0.83158400 | 0.82786500  |
| C | 4.04377400  | -1.29824000 | -1.30704800 |
| H | 4.65733500  | -3.11025700 | -2.26801100 |
| H | 6.46893000  | -2.28207700 | 1.53422700  |
| H | 5.19236300  | -0.20471300 | 1.70099500  |
| H | 3.36919200  | -1.03617400 | -2.11398400 |
| N | 3.37776800  | 0.72060000  | -0.08998100 |
| C | 3.13754000  | 1.44061600  | -1.37262100 |
| H | 2.34537700  | 0.94071800  | -1.93359900 |
| H | 4.05127200  | 1.40752400  | -1.97440900 |
| C | 2.76608400  | 2.88309800  | -0.98502500 |
| C | 3.00142000  | 2.97833600  | 0.53528900  |
| H | 2.05338200  | 2.95187400  | 1.07983400  |
| H | 3.51598000  | 3.89689100  | 0.82544300  |
| C | 3.84118100  | 1.75157900  | 0.86782900  |
| H | 4.90884400  | 1.94358100  | 0.70163700  |
| H | 3.71045500  | 1.40796100  | 1.89452400  |
| H | 3.39949500  | 3.58716800  | -1.52950800 |
| H | 1.72936900  | 3.11114000  | -1.24221900 |
| C | 1.45057800  | 0.09806800  | 0.43173100  |
| H | 1.09715100  | 1.08471000  | 0.18503800  |
| H | 1.53361200  | -0.62540000 | -0.36499700 |
| C | 1.65230000  | -0.33756000 | 1.84757900  |
| H | 1.45285700  | 0.47305600  | 2.55176800  |
| H | 2.66740300  | -0.71173300 | 2.00571700  |
| H | 0.97178800  | -1.16169500 | 2.06715000  |
| H | -3.39310400 | 2.25164000  | -0.35805200 |
| C | -3.74215900 | 1.23770100  | -0.20136100 |
| C | -4.59085100 | -1.39158100 | 0.21010700  |
| C | -2.80838500 | 0.23598800  | 0.06813000  |
| C | -5.09644400 | 0.94224100  | -0.26777300 |
| C | -5.49662400 | -0.37262000 | -0.06004400 |
| C | -3.24077000 | -1.07549900 | 0.27267900  |
| H | -5.83118200 | 1.70963500  | -0.47561300 |
| H | -2.50857000 | -1.84622000 | 0.48177400  |



|   |             |             |             |
|---|-------------|-------------|-------------|
| H | -4.93996200 | -2.40427400 | 0.36664300  |
| C | -1.33151300 | 0.58766500  | 0.13574800  |
| O | -0.99184700 | 1.76907700  | -0.06003800 |
| O | -0.54659200 | -0.38454600 | 0.39660700  |
| N | -6.92233200 | -0.69569600 | -0.12800000 |
| O | -7.71215800 | 0.21091200  | -0.36568100 |
| O | -7.26333800 | -1.85863200 | 0.05554300  |

**Transition state of a ring-opening reaction between an *N*-phenylpyrrolidinium end group model and *p*-nitrobenzoate, *l/p*-nitrobenzoate (TS, op)**

electronic energy = -1147.016851 Hartree

sum of electronic and zero-point energies = -1146.667994

sum of electronic and thermal energies = -1146.636457

sum of electronic and thermal enthalpies = -1146.635383

sum of electronic and thermal free energies = -1146.739085

535.07i (cm<sup>-1</sup>)

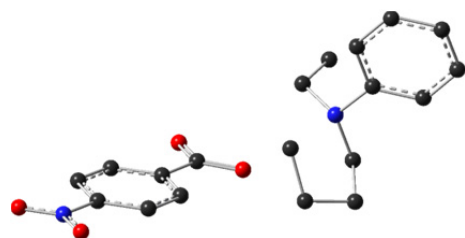

|   |            |             |             |
|---|------------|-------------|-------------|
| H | 5.50378500 | 4.01331500  | -0.78920400 |
| C | 5.08240700 | 3.02818300  | -0.61618600 |
| C | 3.99659400 | 0.47436400  | -0.16838100 |
| C | 5.51404800 | 2.25464800  | 0.45417700  |
| C | 4.09534000 | 2.52382700  | -1.45972500 |
| C | 3.55328300 | 1.26423900  | -1.23637400 |
| C | 4.97791600 | 0.98792300  | 0.68060100  |
| H | 6.27854100 | 2.63052000  | 1.12734300  |
| H | 3.73544700 | 3.11525800  | -2.29602600 |
| H | 2.77353200 | 0.90444000  | -1.89845200 |
| H | 5.34143300 | 0.42026000  | 1.52707900  |
| N | 3.38447200 | -0.82190900 | 0.03169200  |
| C | 3.76106000 | -1.54825700 | 1.26170400  |
| H | 4.83236800 | -1.49395000 | 1.46773900  |
| H | 3.52104500 | -2.60104700 | 1.09387600  |
| C | 2.89129400 | -1.00894100 | 2.38321300  |
| C | 1.45051800 | -1.03537400 | 1.86511900  |
| H | 0.80528000 | -0.42948700 | 2.50319100  |
| H | 1.06112800 | -2.05809100 | 1.87559300  |
| C | 1.38303400 | -0.49049200 | 0.46185800  |

|   |             |             |             |
|---|-------------|-------------|-------------|
| H | 1.10125900  | -1.10954500 | -0.37492500 |
| H | 1.51225500  | 0.56710300  | 0.29055600  |
| H | 2.99566000  | -1.61514100 | 3.28754600  |
| H | 3.18176600  | 0.01520400  | 2.63955200  |
| C | 3.43667400  | -1.69088200 | -1.17498700 |
| H | 2.96309300  | -1.15867300 | -2.00038300 |
| H | 2.80988400  | -2.56012300 | -0.96004200 |
| C | -1.37022800 | -0.73191700 | -0.17913700 |
| O | -0.60331300 | -0.04137400 | 0.57312500  |
| O | -1.01812600 | -1.66137200 | -0.92718200 |
| C | -2.84252600 | -0.35726400 | -0.12930500 |
| C | -3.75999900 | -1.07143700 | -0.90152100 |
| C | -3.28700400 | 0.69115800  | 0.67829300  |
| C | -5.10955500 | -0.74961700 | -0.87372400 |
| H | -3.40229300 | -1.88310200 | -1.52406500 |
| C | -4.63258200 | 1.02940300  | 0.71936100  |
| H | -2.56774900 | 1.23971300  | 1.27462400  |
| C | -5.52188900 | 0.29958200  | -0.06049700 |
| H | -5.83148500 | -1.29588900 | -1.46729700 |
| H | -4.99077200 | 1.84035400  | 1.34064000  |
| C | 4.84244500  | -2.12760100 | -1.56380500 |
| H | 4.79143800  | -2.75797700 | -2.45664200 |
| H | 5.47794800  | -1.26714200 | -1.79269400 |
| H | 5.32051200  | -2.70937500 | -0.77003500 |
| N | -6.94268100 | 0.64811100  | -0.02434400 |
| O | -7.29441600 | 1.57740000  | 0.69343700  |
| O | -7.71809400 | -0.00456600 | -0.71356800 |

**Ground state of an *N*-phenylpiperidinium end group model and benzoate**

electronic energy = -981.894059 Hartree

sum of electronic and zero-point energies = -981.518720

sum of electronic and thermal energies = -981.488768

sum of electronic and thermal enthalpies = -981.487694

sum of electronic and thermal free energies = -981.586392

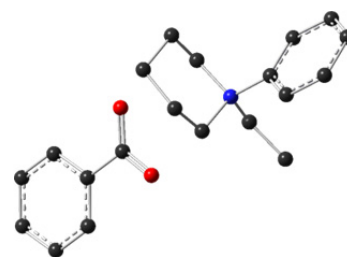

|   |            |             |             |
|---|------------|-------------|-------------|
| H | 7.03600700 | -0.59523600 | -0.48591600 |
| C | 5.95962300 | -0.49225500 | -0.39398500 |

|   |             |             |             |
|---|-------------|-------------|-------------|
| C | 3.19083300  | -0.21535800 | -0.15452400 |
| C | 5.34839400  | -0.59180000 | 0.84950400  |
| C | 5.17645200  | -0.26624900 | -1.52184000 |
| C | 3.79757200  | -0.13148800 | -1.40632500 |
| C | 3.96707900  | -0.45912600 | 0.97303000  |
| H | 5.94098600  | -0.77739900 | 1.73939800  |
| H | 5.63429000  | -0.19576900 | -2.50311300 |
| H | 3.21751000  | 0.03033500  | -2.30613200 |
| H | 3.52769000  | -0.55530600 | 1.95580300  |
| N | 1.70206600  | -0.12757500 | -0.07068800 |
| C | 1.14626000  | 1.03270400  | -0.89390800 |
| H | 1.47632600  | 0.89202300  | -1.92111300 |
| H | 0.05650100  | 0.91539300  | -0.86832900 |
| C | 1.55742800  | 2.38596900  | -0.34118800 |
| H | 1.13939400  | 3.14523500  | -1.01010100 |
| H | 2.64725900  | 2.50319000  | -0.37035400 |
| C | 1.03469500  | 2.56711600  | 1.08200900  |
| H | -0.06119800 | 2.59596500  | 1.06454100  |
| H | 1.37841500  | 3.51810000  | 1.50054400  |
| C | 1.50650600  | 1.40701100  | 1.95588000  |
| H | 1.02023000  | 1.43562400  | 2.93675300  |
| H | 2.58209900  | 1.49568000  | 2.13673600  |
| C | 1.16208900  | 0.05546700  | 1.34180200  |
| H | 0.07992800  | -0.06134600 | 1.22849400  |
| H | 1.52441200  | -0.77174200 | 1.94865000  |
| C | 1.08847100  | -1.40203700 | -0.65706800 |
| H | 1.34709700  | -1.39012400 | -1.71711600 |
| H | 0.00941600  | -1.27102500 | -0.54498400 |
| C | 1.55217200  | -2.69136500 | -0.00734400 |
| H | 2.63041000  | -2.84381800 | -0.09500500 |
| H | 1.05491500  | -3.51364700 | -0.53004000 |
| H | 1.26699000  | -2.75805100 | 1.04512700  |
| H | -4.43775100 | 1.46318000  | -1.54591800 |
| C | -4.90247000 | 0.72630800  | -0.89961300 |
| C | -6.05969800 | -1.17593200 | 0.76718400  |
| C | -4.08153700 | -0.10492100 | -0.13476200 |
| C | -6.28868900 | 0.61138900  | -0.83387200 |

|   |             |             |             |
|---|-------------|-------------|-------------|
| C | -6.87123400 | -0.34126100 | 0.00053700  |
| C | -4.67398700 | -1.05613400 | 0.69843800  |
| H | -6.91580700 | 1.26501300  | -1.43395600 |
| H | -7.95253800 | -0.43284100 | 0.05304200  |
| H | -4.03225300 | -1.69964400 | 1.29064600  |
| H | -6.50775400 | -1.92067000 | 1.41928500  |
| C | -2.56521400 | 0.02383800  | -0.20920200 |
| O | -2.09601300 | 0.88979500  | -0.99391500 |
| O | -1.88467500 | -0.74871300 | 0.52133500  |

**Transition state of a ring-emitting reaction between an *N*-phenylpiperidinium end group model and benzoate**

electronic energy = -981.851668 Hartree

sum of electronic and zero-point energies = -981.478955

sum of electronic and thermal energies = -981.449168

sum of electronic and thermal enthalpies = -981.448094

sum of electronic and thermal free energies = -981.546545

557.48i (cm<sup>-1</sup>)

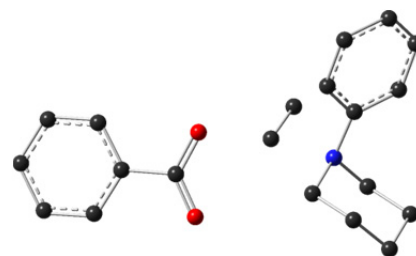

|   |            |             |             |
|---|------------|-------------|-------------|
| H | 5.04418200 | -3.82841200 | -0.51287800 |
| C | 4.43648900 | -2.93664300 | -0.39743500 |
| C | 2.86454000 | -0.61564500 | -0.10210300 |
| C | 4.56159900 | -2.13641100 | 0.73128100  |
| C | 3.51606400 | -2.57541600 | -1.37734900 |
| C | 2.73772900 | -1.43298400 | -1.23346500 |
| C | 3.78585200 | -0.98901000 | 0.88168200  |
| H | 5.27083800 | -2.39643400 | 1.51117800  |
| H | 3.39406900 | -3.18755800 | -2.26574600 |
| H | 2.02765600 | -1.19577900 | -2.01600100 |
| H | 3.92226100 | -0.39486600 | 1.77525100  |
| N | 1.98590800 | 0.51736300  | 0.06263900  |
| C | 1.77672800 | 1.33036000  | -1.16700400 |
| H | 1.47669600 | 0.68018900  | -1.98696000 |
| H | 0.92718300 | 1.98876800  | -0.96071100 |
| C | 3.00048000 | 2.16670300  | -1.52813700 |
| H | 2.77722000 | 2.73487100  | -2.43748900 |
| H | 3.84340300 | 1.50520600  | -1.76281600 |

|   |             |             |             |
|---|-------------|-------------|-------------|
| C | 3.36713500  | 3.10505800  | -0.37725200 |
| H | 2.57506700  | 3.85641600  | -0.25820500 |
| H | 4.28996300  | 3.64886700  | -0.60404300 |
| C | 3.52168500  | 2.31759400  | 0.92529400  |
| H | 3.64372100  | 2.99512500  | 1.77732700  |
| H | 4.42558100  | 1.70074200  | 0.87742700  |
| C | 2.29678200  | 1.43924600  | 1.18327100  |
| H | 1.41279400  | 2.07461000  | 1.30115600  |
| H | 2.39188400  | 0.86560000  | 2.10482900  |
| C | 0.08534900  | -0.20836100 | 0.43423100  |
| H | 0.14854100  | -0.76574000 | -0.48764400 |
| H | -0.26567100 | 0.80987400  | 0.39183600  |
| C | 0.28245800  | -0.91820600 | 1.73717700  |
| H | 1.29649500  | -1.31754100 | 1.82411900  |
| H | -0.40213100 | -1.76594200 | 1.78879200  |
| H | 0.08379900  | -0.25989800 | 2.58555400  |
| H | -4.74240200 | 2.07225000  | -0.12200300 |
| C | -5.09788500 | 1.04753200  | -0.13503900 |
| C | -5.97148200 | -1.59443800 | -0.16375900 |
| C | -4.17117200 | 0.01354500  | 0.01017900  |
| C | -6.45153400 | 0.76542200  | -0.29359300 |
| C | -6.89120600 | -0.55726500 | -0.30826400 |
| C | -4.61806300 | -1.30925200 | -0.00545100 |
| H | -7.16453600 | 1.57721200  | -0.40584800 |
| H | -7.94740500 | -0.77904200 | -0.43192700 |
| H | -3.89514300 | -2.10964100 | 0.10774600  |
| H | -6.30939900 | -2.62676000 | -0.17458700 |
| C | -2.70170100 | 0.34010600  | 0.18041000  |
| O | -2.34504700 | 1.53563300  | 0.18251200  |
| O | -1.91809100 | -0.66254200 | 0.31437800  |

**Transition state of a ring-opening reaction between an *N*-phenylpiperidinium end group model and benzoate**

electronic energy = -981.849943 Hartree

sum of electronic and zero-point energies = -981.477094

sum of electronic and thermal energies = -981.447460

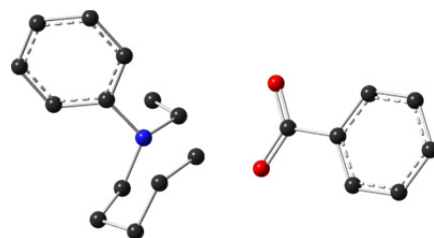

sum of electronic and thermal enthalpies = -981.446386

sum of electronic and thermal free energies = -981.543278

557.01*i* (cm<sup>-1</sup>)

|   |             |             |             |
|---|-------------|-------------|-------------|
| N | -2.15094500 | 0.55338800  | 0.73468900  |
| C | -0.19790800 | 0.73508400  | 0.01296900  |
| H | -0.01261000 | 1.39512400  | 0.84635900  |
| H | -0.05268800 | -0.31948200 | 0.16702500  |
| C | -0.51944400 | 1.30647900  | -1.33614900 |
| H | -1.14094000 | 0.59537200  | -1.89258600 |
| H | 0.42205900  | 1.39302800  | -1.88236200 |
| C | -1.20530400 | 2.67084400  | -1.25528400 |
| H | -1.25260400 | 3.10734300  | -2.25847000 |
| H | -0.59163700 | 3.34846400  | -0.64721700 |
| C | -2.61901900 | 2.58813500  | -0.68415900 |
| H | -3.26081900 | 2.05744200  | -1.39403500 |
| H | -3.03848000 | 3.59524900  | -0.58166400 |
| C | -2.68932500 | 1.93392800  | 0.69334300  |
| H | -3.71368600 | 1.96243900  | 1.07969200  |
| H | -2.07866600 | 2.51207800  | 1.39395100  |
| C | 2.42269900  | -0.31243000 | 0.08635700  |
| O | 1.82982900  | 0.79344600  | -0.17130000 |
| C | 3.93455300  | -0.28290500 | 0.01302000  |
| C | 4.61692900  | 0.89261200  | -0.30658000 |
| C | 4.66272600  | -1.44636200 | 0.26795200  |
| C | 6.00754300  | 0.90506500  | -0.37014100 |
| H | 4.04704300  | 1.79381600  | -0.50422800 |
| C | 6.05300900  | -1.43679400 | 0.20480600  |
| H | 4.12455600  | -2.35500900 | 0.51528100  |
| C | 6.72849000  | -0.26001900 | -0.11451600 |
| H | 6.52971800  | 1.82437800  | -0.61943800 |
| H | 6.61062800  | -2.34731800 | 0.40464800  |
| H | 7.81359900  | -0.25098100 | -0.16406900 |
| O | 1.85109400  | -1.38072400 | 0.38201200  |
| C | -2.90048200 | -0.44549600 | -0.00280400 |
| C | -4.20040800 | -0.22456600 | -0.46091100 |
| C | -2.30936000 | -1.69176100 | -0.23881200 |
| C | -4.88509300 | -1.22088000 | -1.15418100 |

|   |             |             |             |
|---|-------------|-------------|-------------|
| H | -4.70261800 | 0.71680800  | -0.27879900 |
| C | -2.99791300 | -2.68374700 | -0.92698000 |
| H | -1.30687700 | -1.90464000 | 0.11541400  |
| C | -4.28967600 | -2.45357100 | -1.39388000 |
| H | -5.89510700 | -1.02439700 | -1.50096800 |
| H | -2.51601000 | -3.64122900 | -1.09933400 |
| H | -4.82502200 | -3.22783100 | -1.93438000 |
| C | -1.90009600 | 0.11627200  | 2.13818400  |
| H | -1.22966800 | 0.85532600  | 2.58522500  |
| H | -1.35049900 | -0.82602300 | 2.09357000  |
| C | -3.14619100 | -0.04766100 | 2.99942500  |
| H | -3.83538100 | -0.78271200 | 2.57414700  |
| H | -2.84624200 | -0.40152100 | 3.99044000  |
| H | -3.68319700 | 0.89542700  | 3.13331900  |

**Ground state of an *N*-phenylazepanium end group model and benzoate, II/benzoate (GS)**

electronic energy = -1021.168069 Hartree

sum of electronic and zero-point energies = -1020.766024

sum of electronic and thermal energies = -1020.734586

sum of electronic and thermal enthalpies = -1020.733512

sum of electronic and thermal free energies = -1020.834295

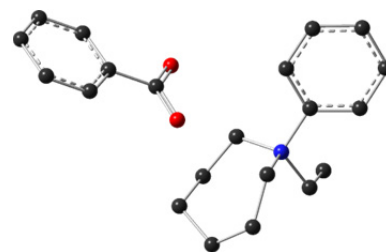

|   |             |             |             |
|---|-------------|-------------|-------------|
| C | -2.48853600 | 1.04033800  | -0.07517500 |
| C | -2.80558800 | 3.79449000  | -0.39137700 |
| C | -1.39137100 | 1.88623400  | 0.07710300  |
| C | -3.73434000 | 1.56420500  | -0.41018500 |
| C | -3.88829500 | 2.94003200  | -0.56091500 |
| C | -1.56095300 | 3.25925100  | -0.07786700 |
| H | -0.39698300 | 1.50759600  | 0.30102200  |
| H | -4.60197200 | 0.93730800  | -0.55968700 |
| H | -4.86701300 | 3.33499200  | -0.81368700 |
| H | -0.70042800 | 3.90945900  | 0.04475700  |
| H | -2.92928600 | 4.86638000  | -0.50901900 |
| H | -3.30541200 | -2.26382600 | 0.08719500  |
| C | -3.57181600 | -1.21279800 | 0.14881100  |
| H | -4.15612200 | -0.98747100 | -0.74253200 |
| C | -4.35633900 | -0.96265100 | 1.42769600  |

|   |             |             |             |
|---|-------------|-------------|-------------|
| H | -5.33217600 | -1.44413900 | 1.31818800  |
| H | -4.52663500 | 0.09611200  | 1.62938100  |
| H | -3.86839900 | -1.40542300 | 2.29848400  |
| C | 2.13773000  | 0.29654600  | -0.08284800 |
| O | 1.61299300  | -0.16335800 | -1.13095400 |
| O | 1.50778300  | 0.73719800  | 0.91862000  |
| C | 3.65895800  | 0.32137400  | -0.01357100 |
| C | 4.31030000  | 0.80776800  | 1.12177200  |
| C | 4.42566400  | -0.14211900 | -1.08470400 |
| C | 5.70107500  | 0.83088400  | 1.18773500  |
| H | 3.71013300  | 1.16697700  | 1.95079200  |
| C | 5.81670800  | -0.12082500 | -1.02398600 |
| H | 3.91523700  | -0.51849600 | -1.96481800 |
| C | 6.45836800  | 0.36619500  | 0.11368500  |
| H | 6.19534200  | 1.21176300  | 2.07724300  |
| H | 6.40158000  | -0.48403100 | -1.86457900 |
| H | 7.54355200  | 0.38363000  | 0.16294800  |
| C | -1.38331700 | -0.73238700 | 1.23725100  |
| C | -1.54481700 | -0.84522700 | -1.26746100 |
| C | -1.06990400 | -2.19325500 | 1.52409200  |
| H | -0.44290400 | -0.20894000 | 1.06531000  |
| H | -1.88476400 | -0.26952400 | 2.08807300  |
| C | -1.58916800 | -2.30750900 | -1.70500600 |
| H | -0.51346600 | -0.50322900 | -1.13806500 |
| H | -2.00861000 | -0.24383900 | -2.05084300 |
| C | -0.26813000 | -2.93937300 | 0.45202800  |
| H | -1.96845500 | -2.76393100 | 1.78630300  |
| H | -0.47201500 | -2.14907200 | 2.44193300  |
| C | -1.11304100 | -3.40696900 | -0.73331600 |
| H | -0.93617300 | -2.30402700 | -2.58548700 |
| H | -2.58433400 | -2.55633700 | -2.08724400 |
| H | 0.56600000  | -2.31586700 | 0.10901800  |
| H | 0.17401600  | -3.82466600 | 0.92240700  |
| H | -0.54208700 | -4.14252500 | -1.30951100 |
| H | -1.97913500 | -3.95530400 | -0.34076100 |
| N | -2.27354600 | -0.44707300 | 0.02846900  |



**Transition state of a ring-emitting reaction between an *N*-phenylazepanium end group model and benzoate, II/benzoate (TS, em)**

electronic energy = -1021.130891 Hartree

sum of electronic and zero-point energies = -1020.731960

sum of electronic and thermal energies = -1020.700527

sum of electronic and thermal enthalpies = -1020.699453

sum of electronic and thermal free energies = -1020.801669

566.70i (cm<sup>-1</sup>)

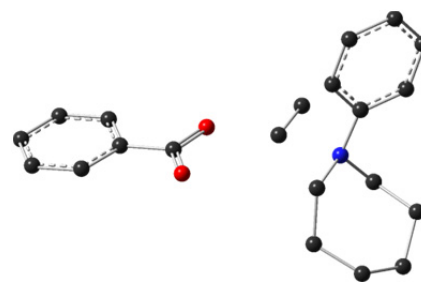

|   |             |             |             |
|---|-------------|-------------|-------------|
| H | 4.31460600  | -4.39210900 | -1.08523000 |
| C | 3.85031800  | -3.44296400 | -0.83722300 |
| C | 2.64867000  | -0.97866400 | -0.19284900 |
| C | 4.27286600  | -2.71782000 | 0.27012300  |
| C | 2.82472600  | -2.92945100 | -1.62627000 |
| C | 2.23054400  | -1.71326300 | -1.31124400 |
| C | 3.68211800  | -1.49786400 | 0.59312900  |
| H | 5.07664000  | -3.09352700 | 0.89595900  |
| H | 2.47747100  | -3.47688300 | -2.49717500 |
| H | 1.43556600  | -1.34435600 | -1.94803200 |
| H | 4.05728100  | -0.96208900 | 1.45479600  |
| N | 1.96489400  | 0.24997200  | 0.13128100  |
| C | 0.05881000  | -0.27197300 | 0.72463700  |
| H | -0.03895700 | -0.82351300 | -0.19532000 |
| H | -0.18093800 | 0.77681300  | 0.70222200  |
| C | 0.31584100  | -0.99931500 | 2.00530700  |
| H | 1.21676300  | -1.61471700 | 1.93326400  |
| H | -0.52176300 | -1.67057600 | 2.20028800  |
| H | 0.41250400  | -0.31635700 | 2.85152700  |
| C | 2.52457300  | 1.01159100  | 1.26816400  |
| H | 2.66839400  | 0.30712200  | 2.08515500  |
| H | 1.74278300  | 1.69564400  | 1.60741200  |
| C | 3.80848100  | 1.80449100  | 0.98736600  |
| H | 4.41400700  | 1.29205600  | 0.23027000  |
| H | 4.40813000  | 1.81306300  | 1.90461000  |
| C | 3.53182200  | 3.24762600  | 0.56400300  |
| H | 4.47894900  | 3.79692100  | 0.50922400  |
| H | 2.93901600  | 3.73309000  | 1.35141200  |

|   |             |             |             |
|---|-------------|-------------|-------------|
| C | 2.80296000  | 3.38116100  | -0.77212900 |
| H | 2.57698200  | 4.44006200  | -0.94332600 |
| H | 3.47491400  | 3.07569600  | -1.58597900 |
| C | 1.50176200  | 2.57921900  | -0.89774500 |
| H | 0.98179900  | 2.91889600  | -1.80036000 |
| H | 0.81897800  | 2.80133300  | -0.06967000 |
| C | 1.68020500  | 1.07335400  | -1.09299500 |
| H | 0.76530100  | 0.67703100  | -1.53782600 |
| H | 2.49071000  | 0.90975000  | -1.81056000 |
| H | -4.17812800 | -1.14171800 | 1.77829300  |
| C | -4.78074800 | -0.70060200 | 0.99193000  |
| C | -6.30191800 | 0.44156300  | -1.04017800 |
| C | -4.14209300 | -0.03959500 | -0.05918000 |
| C | -6.16956200 | -0.79078300 | 1.02851100  |
| C | -6.93324100 | -0.21964900 | 0.01209900  |
| C | -4.91329100 | 0.53026300  | -1.07385800 |
| H | -6.65693900 | -1.30705600 | 1.85068700  |
| H | -8.01693300 | -0.28955300 | 0.03991800  |
| H | -4.40954600 | 1.04229500  | -1.88674800 |
| H | -6.89276100 | 0.88836100  | -1.83472800 |
| C | -2.63121700 | 0.06826600  | -0.11207200 |
| O | -2.10061100 | 0.67271300  | -1.06439900 |
| O | -1.99674500 | -0.48509000 | 0.85237400  |

**Transition state of a ring-opening reaction between an *N*-phenylazepanium end group model and benzoate, II/benzoate (TS, op)**

electronic energy = -1021.131657 Hartree

sum of electronic and zero-point energies = -1020.732628

sum of electronic and thermal energies = -1020.701346

sum of electronic and thermal enthalpies = -1020.700272

sum of electronic and thermal free energies = -1020.800910

546.57i (cm<sup>-1</sup>)

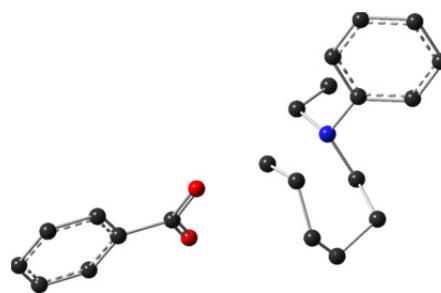

|   |             |            |             |
|---|-------------|------------|-------------|
| H | -5.88971600 | 2.91168600 | -0.90305100 |
| C | -5.11932500 | 2.21653300 | -0.58469000 |
| C | -3.12259300 | 0.41475200 | 0.23663200  |
| C | -3.93772700 | 2.68507000 | -0.01413500 |

|   |             |             |             |
|---|-------------|-------------|-------------|
| C | -5.29649000 | 0.84777300  | -0.74051600 |
| C | -4.30962400 | -0.04898800 | -0.33273200 |
| C | -2.95047000 | 1.79596300  | 0.39014100  |
| H | -3.77723000 | 3.75100700  | 0.11514600  |
| H | -6.21128400 | 0.46091700  | -1.17914100 |
| H | -4.49222900 | -1.10741500 | -0.46220000 |
| H | -2.03969300 | 2.19255100  | 0.82400300  |
| N | -2.06376000 | -0.47124200 | 0.67830200  |
| C | -1.81854000 | -0.33999300 | 2.14656400  |
| H | -1.59440600 | 0.70822400  | 2.35016500  |
| H | -0.90994800 | -0.90774900 | 2.36438500  |
| C | -2.23710700 | -1.90360200 | 0.32058900  |
| H | -3.20580000 | -2.24920200 | 0.69440400  |
| H | -1.47999200 | -2.44671700 | 0.89340400  |
| C | -2.09274300 | -2.29625300 | -1.15534600 |
| H | -2.72387400 | -1.67306800 | -1.79738500 |
| H | -2.51576200 | -3.30556700 | -1.21437400 |
| C | -0.65758300 | -2.33953900 | -1.70449500 |
| H | -0.59823200 | -3.12270000 | -2.46848900 |
| H | 0.02336500  | -2.65598500 | -0.90517900 |
| C | -0.15706600 | -1.03143000 | -2.32884400 |
| H | 0.92839800  | -1.09461400 | -2.46178800 |
| H | -0.58970000 | -0.91661500 | -3.32999800 |
| C | -0.49894200 | 0.22216000  | -1.52405100 |
| H | -1.55437200 | 0.47809200  | -1.65538000 |
| H | 0.05742900  | 1.08129200  | -1.90780000 |
| C | -0.20937500 | 0.10739600  | -0.05911200 |
| H | -0.24989000 | 0.98604600  | 0.56356000  |
| H | 0.19327500  | -0.79084400 | 0.37987900  |
| C | 2.61066300  | -0.21419100 | 0.21895400  |
| O | 1.77605500  | 0.62365200  | -0.26834100 |
| C | 4.06884800  | 0.19235300  | 0.15761100  |
| C | 4.45233200  | 1.41669700  | -0.39334500 |
| C | 5.04892700  | -0.66620000 | 0.65891800  |
| C | 5.79602300  | 1.77757600  | -0.44267400 |
| H | 3.68750600  | 2.08044800  | -0.78144700 |
| C | 6.39302900  | -0.30815900 | 0.61075400  |

|   |             |             |             |
|---|-------------|-------------|-------------|
| H | 4.74196500  | -1.61494600 | 1.08575100  |
| C | 6.76938600  | 0.91550900  | 0.05930800  |
| H | 6.08458800  | 2.73223500  | -0.87322200 |
| H | 7.14793400  | -0.98340900 | 1.00337700  |
| H | 7.81801100  | 1.19649300  | 0.02094300  |
| O | 2.31172800  | -1.31448800 | 0.72582600  |
| C | -2.96060600 | -0.80158300 | 3.04301400  |
| H | -2.69414500 | -0.59701000 | 4.08433300  |
| H | -3.88745600 | -0.26443200 | 2.82131900  |
| H | -3.15079700 | -1.87439200 | 2.95551000  |

**Transition state of a ring-emitting reaction between an *N*-phenylazepanium end group model and *p*-methoxybenzoate, II/*p*-methoxybenzoate (TS, em)**

electronic energy = -1135.615138 Hartree

sum of electronic and zero-point energies = -1135.186689

sum of electronic and thermal energies = -1135.151849

sum of electronic and thermal enthalpies = -1135.1507775

sum of electronic and thermal free energies = -1135.260169

568.59i (cm<sup>-1</sup>)

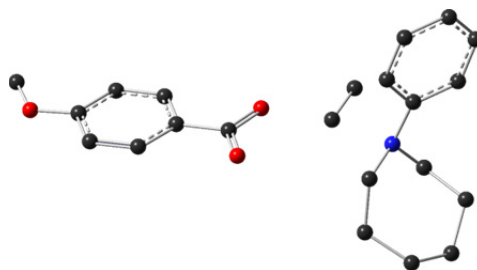

|   |            |             |             |
|---|------------|-------------|-------------|
| H | 4.91198900 | -4.47960100 | -1.07262700 |
| C | 4.47549800 | -3.51801800 | -0.82205400 |
| C | 3.34569200 | -1.02183100 | -0.17094200 |
| C | 4.90439500 | -2.81803600 | 0.29895600  |
| C | 3.47983700 | -2.96321100 | -1.62142300 |
| C | 2.92119200 | -1.73116500 | -1.30310400 |
| C | 4.34909500 | -1.58242100 | 0.62537200  |
| H | 5.68547400 | -3.22619600 | 0.93315300  |
| H | 3.12831400 | -3.49034300 | -2.50306600 |
| H | 2.14877300 | -1.32999600 | -1.94808900 |
| H | 4.72801400 | -1.06771700 | 1.49816500  |
| N | 2.69742100 | 0.22563500  | 0.15527600  |
| C | 0.76870800 | -0.23754400 | 0.70710500  |
| H | 0.66813400 | -0.77723900 | -0.21930000 |
| H | 0.56124600 | 0.81824400  | 0.69065200  |
| C | 0.97651600 | -0.98317500 | 1.98632700  |
| H | 1.85538700 | -1.63084000 | 1.92507300  |

|   |             |             |             |
|---|-------------|-------------|-------------|
| H | 0.11127000  | -1.62414100 | 2.16142500  |
| H | 1.08356800  | -0.31051300 | 2.83956100  |
| C | 3.26337200  | 0.95650200  | 1.30918200  |
| H | 3.37114300  | 0.23900400  | 2.12034700  |
| H | 2.49874000  | 1.66185400  | 1.64394200  |
| C | 4.57665000  | 1.71003900  | 1.05703800  |
| H | 5.17701200  | 1.18619900  | 0.30363000  |
| H | 5.16170100  | 1.68906300  | 1.98344100  |
| C | 4.35408700  | 3.16603400  | 0.64570600  |
| H | 5.31942200  | 3.68448000  | 0.61219400  |
| H | 3.76477100  | 3.66219900  | 1.42906200  |
| C | 3.65169800  | 3.33782800  | -0.70020400 |
| H | 3.46252500  | 4.40528000  | -0.86270300 |
| H | 4.32662200  | 3.01981600  | -1.50673000 |
| C | 2.32794400  | 2.57935100  | -0.85550500 |
| H | 1.83358700  | 2.94531800  | -1.76222600 |
| H | 1.63952500  | 2.81422500  | -0.03565600 |
| C | 2.46177400  | 1.07074700  | -1.06488500 |
| H | 1.54284000  | 0.70871300  | -1.53006600 |
| H | 3.27985700  | 0.88890900  | -1.76933200 |
| H | -3.53618700 | -0.92999800 | 1.67424300  |
| C | -4.09450600 | -0.49332200 | 0.85331300  |
| C | -5.51457500 | 0.62791300  | -1.25060200 |
| C | -3.39781000 | 0.10609900  | -0.19266000 |
| C | -5.48766400 | -0.54204200 | 0.86569500  |
| C | -6.20166900 | 0.02174800  | -0.19255300 |
| C | -4.13065000 | 0.66656200  | -1.24524000 |
| H | -5.99666500 | -1.01645900 | 1.69589800  |
| H | -3.59449100 | 1.13555300  | -2.06330400 |
| H | -6.08640500 | 1.06143700  | -2.06527600 |
| C | -1.88916700 | 0.16001000  | -0.20643200 |
| O | -1.30995500 | 0.71397900  | -1.16295600 |
| O | -1.29735200 | -0.38259900 | 0.79239300  |
| O | -7.55948000 | 0.03036400  | -0.28210600 |
| C | -8.31181900 | -0.57083400 | 0.76156000  |
| H | -9.35829200 | -0.45020500 | 0.48286500  |
| H | -8.07846400 | -1.63710000 | 0.85255500  |

H                    -8.12865700    -0.07076400    1.71867400

**Transition state of a ring-opening reaction between an *N*-phenylazepanium end group model and *p*-methoxybenzoate, II/*p*-methoxybenzoate (TS, op)**

electronic energy = -1135.615940 Hartree

sum of electronic and zero-point energies = -1135.187468

sum of electronic and thermal energies = -1135.152727

sum of electronic and thermal enthalpies = -1135.151653

sum of electronic and thermal free energies = -1135.260656

548.23i (cm<sup>-1</sup>)

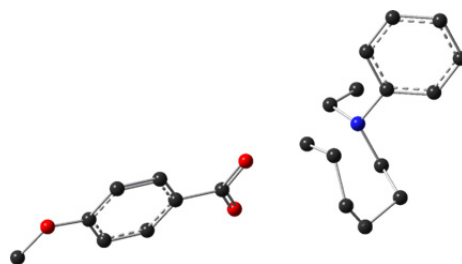

|   |             |             |             |
|---|-------------|-------------|-------------|
| H | -6.51087800 | 3.07396400  | -0.86708200 |
| C | -5.76305400 | 2.35279300  | -0.55281100 |
| C | -3.82494200 | 0.48348000  | 0.25784300  |
| C | -4.55482400 | 2.78101300  | -0.00686300 |
| C | -5.99615200 | 0.99037100  | -0.68919000 |
| C | -5.03844700 | 0.06024100  | -0.28660400 |
| C | -3.59653700 | 1.85848900  | 0.39217900  |
| H | -4.35071900 | 3.84121500  | 0.10725000  |
| H | -6.93252500 | 0.63477200  | -1.10830500 |
| H | -5.26432600 | -0.99161000 | -0.40033200 |
| H | -2.66430300 | 2.22396200  | 0.80735600  |
| N | -2.79394400 | -0.43835100 | 0.69255000  |
| C | -2.51623100 | -0.29702900 | 2.15425000  |
| H | -2.24712500 | 0.74405900  | 2.33878200  |
| H | -1.62675700 | -0.89726500 | 2.36343000  |
| C | -3.03182900 | -1.86766600 | 0.35978800  |
| H | -4.00707600 | -2.16727600 | 0.75542200  |
| H | -2.28761200 | -2.43287800 | 0.92808900  |
| C | -2.92976200 | -2.28838900 | -1.11185000 |
| H | -3.54652100 | -1.65019900 | -1.75309300 |
| H | -3.39400600 | -3.28055500 | -1.14719800 |
| C | -1.50734900 | -2.39800200 | -1.68417300 |
| H | -1.49239900 | -3.19457400 | -2.43637800 |
| H | -0.82615600 | -2.72928700 | -0.89107300 |
| C | -0.96617600 | -1.12040700 | -2.33718000 |
| H | 0.11390500  | -1.22757400 | -2.48464300 |

|   |             |             |             |
|---|-------------|-------------|-------------|
| H | -1.40923500 | -1.00487300 | -3.33370200 |
| C | -1.24733800 | 0.15804000  | -1.54821500 |
| H | -2.29447000 | 0.45144900  | -1.66725800 |
| H | -0.66529700 | 0.98885900  | -1.95538100 |
| C | -0.93739900 | 0.05646000  | -0.08631600 |
| H | -0.93228500 | 0.94695200  | 0.52055500  |
| H | -0.55651700 | -0.84743000 | 0.36072100  |
| C | 1.87647400  | -0.35268800 | 0.16760800  |
| O | 1.06431400  | 0.49743300  | -0.33917100 |
| C | 3.34087000  | 0.00344200  | 0.08820800  |
| C | 3.77140600  | 1.19393700  | -0.50940600 |
| C | 4.29964400  | -0.85691900 | 0.61614800  |
| C | 5.11787600  | 1.51062400  | -0.57569100 |
| H | 3.03312300  | 1.87159500  | -0.92392400 |
| C | 5.65897100  | -0.55520100 | 0.55947800  |
| H | 3.97161900  | -1.78061200 | 1.08081100  |
| C | 6.07036200  | 0.63591000  | -0.04064200 |
| H | 5.45637900  | 2.43245100  | -1.03856400 |
| H | 6.37698100  | -1.24806200 | 0.98117300  |
| O | 1.54182800  | -1.42843300 | 0.70734800  |
| C | -3.65883600 | -0.70071400 | 3.07751100  |
| H | -3.36534000 | -0.49240600 | 4.11078800  |
| H | -4.56778600 | -0.13042100 | 2.86465300  |
| H | -3.89258000 | -1.76627500 | 3.00906100  |
| O | 7.36822400  | 1.02919200  | -0.15138300 |
| C | 8.38055200  | 0.18177000  | 0.37220100  |
| H | 9.32511900  | 0.68769200  | 0.17438800  |
| H | 8.25941100  | 0.04293500  | 1.45184700  |
| H | 8.37638600  | -0.79300400 | -0.12723700 |

**Transition state of a ring-emitting reaction between an *N*-phenylazepanium end group model and *p*-nitrobenzoate, II/*p*-nitrobenzoate (TS, em)**

electronic energy = -1225.583433 Hartree

sum of electronic and zero-point energies = -1225.182291

sum of electronic and thermal energies = -1225.147491

sum of electronic and thermal enthalpies = -1225.146417

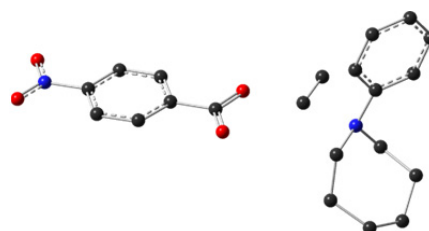

sum of electronic and thermal free energies = -1225.257151

563.99i (cm<sup>-1</sup>)

|   |            |             |             |
|---|------------|-------------|-------------|
| H | 5.16578300 | -4.44685300 | -1.17415100 |
| C | 4.72924200 | -3.48980300 | -0.90691900 |
| C | 3.59911200 | -1.00466000 | -0.21256800 |
| C | 5.16700000 | -2.80307600 | 0.21886200  |
| C | 3.72466200 | -2.92717500 | -1.68946700 |
| C | 3.16594700 | -1.70083300 | -1.34992700 |
| C | 4.61183500 | -1.57323800 | 0.56658100  |
| H | 5.95534100 | -3.21715900 | 0.84010900  |
| H | 3.36618300 | -3.44364200 | -2.57463000 |
| H | 2.38665800 | -1.29353400 | -1.98270300 |
| H | 4.99852400 | -1.06855000 | 1.44181900  |
| N | 2.95077800 | 0.23485600  | 0.13696600  |
| C | 1.01412800 | -0.25686400 | 0.72142400  |
| H | 0.91711800 | -0.78639300 | -0.21160100 |
| H | 0.81120900 | 0.80006700  | 0.71811500  |
| C | 1.25653700 | -1.01386500 | 1.98698200  |
| H | 2.14889900 | -1.64007000 | 1.90311600  |
| H | 0.41032500 | -1.67887600 | 2.16628300  |
| H | 1.36087200 | -0.34995700 | 2.84720400  |
| C | 3.52638800 | 0.95512500  | 1.29204600  |
| H | 3.64916100 | 0.22897300  | 2.09340100  |
| H | 2.76234700 | 1.65203200  | 1.64550800  |
| C | 4.83192400 | 1.71956200  | 1.03222700  |
| H | 5.42590800 | 1.20706300  | 0.26603400  |
| H | 5.42852000 | 1.69291000  | 1.95109100  |
| C | 4.59503800 | 3.17815700  | 0.63867100  |
| H | 5.55672600 | 3.70266700  | 0.59640000  |
| H | 4.01429100 | 3.66305300  | 1.43538500  |
| C | 3.87226200 | 3.35956900  | -0.69516800 |
| H | 3.67642100 | 4.42771100  | -0.84460900 |
| H | 4.53653800 | 3.05213800  | -1.51451300 |
| C | 2.54920500 | 2.59736800  | -0.83862400 |
| H | 2.03953500 | 2.97152500  | -1.73347000 |
| H | 1.87276400 | 2.82033400  | -0.00547300 |



|   |             |             |             |
|---|-------------|-------------|-------------|
| C | 2.68593200  | 1.09179300  | -1.06742200 |
| H | 1.76001300  | 0.73064900  | -1.51987500 |
| H | 3.49003500  | 0.92290700  | -1.79108800 |
| H | -3.21779100 | -1.04373800 | 1.75917600  |
| C | -3.81178900 | -0.59175400 | 0.97385200  |
| C | -5.30706100 | 0.58682300  | -1.07097700 |
| C | -3.16582600 | 0.06086600  | -0.07767600 |
| C | -5.19738700 | -0.66258600 | 1.01646500  |
| C | -5.92164800 | -0.06944400 | -0.01084200 |
| C | -3.92089100 | 0.64672200  | -1.09494800 |
| H | -5.71095600 | -1.16523600 | 1.82611500  |
| H | -3.40707100 | 1.15031300  | -1.90545200 |
| H | -5.90436300 | 1.03724700  | -1.85346900 |
| C | -1.64849500 | 0.14404500  | -0.12952000 |
| O | -1.11670100 | 0.73957500  | -1.08251000 |
| O | -1.03376200 | -0.42099400 | 0.83742000  |
| N | -7.38288300 | -0.13766500 | 0.02509000  |
| O | -7.91417300 | -0.71643500 | 0.96598000  |
| O | -8.01098100 | 0.38706500  | -0.88731800 |

**Transition state of a ring-opening reaction between an *N*-phenylazepanium end group model and *p*-nitrobenzoate, II/*p*-nitrobenzoate (TS, op)**

electronic energy = -1225.584132 Hartree

sum of electronic and zero-point energies = -1225.182815

sum of electronic and thermal energies = -1225.148178

sum of electronic and thermal enthalpies = -1225.147104

sum of electronic and thermal free energies = -1225.256564

544.24i (cm<sup>-1</sup>)

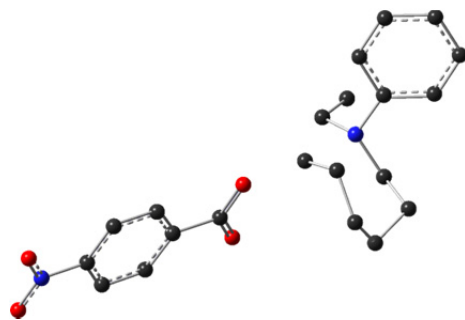

|   |             |            |             |
|---|-------------|------------|-------------|
| H | -6.60238500 | 3.30427800 | -0.67094300 |
| C | -5.89101300 | 2.52809900 | -0.40718300 |
| C | -4.04669600 | 0.51642700 | 0.27291700  |
| C | -4.68769700 | 2.85497400 | 0.21447300  |
| C | -6.16633800 | 1.19524800 | -0.68429200 |
| C | -5.25542100 | 0.19485100 | -0.34689300 |
| C | -3.77576200 | 1.86249700 | 0.54897800  |
| H | -4.45102800 | 3.89053700 | 0.43878300  |

|   |             |             |             |
|---|-------------|-------------|-------------|
| H | -7.09983400 | 0.91773000  | -1.16435500 |
| H | -5.51360200 | -0.83159500 | -0.57052500 |
| H | -2.84599600 | 2.15083300  | 1.02601300  |
| N | -3.06346700 | -0.48111600 | 0.64266700  |
| C | -2.81943500 | -0.49167000 | 2.11636000  |
| H | -2.51664300 | 0.51516600  | 2.40808200  |
| H | -1.95894100 | -1.14412600 | 2.28742800  |
| C | -3.33950200 | -1.86102200 | 0.16524300  |
| H | -4.33629000 | -2.16255100 | 0.50224000  |
| H | -2.63269000 | -2.50607800 | 0.69504200  |
| C | -3.20622800 | -2.14122300 | -1.33735000 |
| H | -3.78144800 | -1.42249800 | -1.93016400 |
| H | -3.70181600 | -3.10792900 | -1.48204500 |
| C | -1.77171600 | -2.24642100 | -1.88004000 |
| H | -1.76026000 | -2.96974400 | -2.70288200 |
| H | -1.12433800 | -2.67381100 | -1.10468500 |
| C | -1.17140800 | -0.93382100 | -2.39786700 |
| H | -0.09270000 | -1.06645100 | -2.53558500 |
| H | -1.58781700 | -0.70835000 | -3.38689700 |
| C | -1.42562700 | 0.27415100  | -1.49679300 |
| H | -2.46017400 | 0.61329200  | -1.60285200 |
| H | -0.81044500 | 1.12014800  | -1.81444600 |
| C | -1.14922700 | 0.02611900  | -0.04657300 |
| H | -1.14390300 | 0.85157700  | 0.64614900  |
| H | -0.82701800 | -0.93300200 | 0.32437200  |
| C | 1.62936100  | -0.50599300 | 0.21434400  |
| O | 0.85600200  | 0.41685000  | -0.20981300 |
| C | 3.11495400  | -0.18840300 | 0.16289400  |
| C | 3.56697300  | 1.04659200  | -0.30538300 |
| C | 4.03708300  | -1.14513700 | 0.59008400  |
| C | 4.92484100  | 1.33098100  | -0.34942800 |
| H | 2.84400000  | 1.78300600  | -0.63522400 |
| C | 5.39881700  | -0.88043400 | 0.55372800  |
| H | 3.67257300  | -2.09961600 | 0.95139300  |
| C | 5.81849900  | 0.35819700  | 0.08267700  |
| H | 5.28911700  | 2.28449000  | -0.71007300 |
| H | 6.12452000  | -1.61359500 | 0.88204300  |

|   |             |             |             |
|---|-------------|-------------|-------------|
| O | 1.27378600  | -1.61494500 | 0.65264200  |
| C | -4.00027900 | -0.93727500 | 2.96992200  |
| H | -3.72753000 | -0.84117900 | 4.02518000  |
| H | -4.88166000 | -0.31407600 | 2.79224700  |
| H | -4.27102800 | -1.98135600 | 2.79257500  |
| N | 7.25219600  | 0.64845200  | 0.04031100  |
| O | 7.61049900  | 1.74430400  | -0.37583600 |
| O | 8.03110800  | -0.21706700 | 0.42292700  |

### Ground state of a thiolanium end group model and benzoate

electronic energy = -1054.529154 Hartree

sum of electronic and zero-point energies = -1054.270295

sum of electronic and thermal energies = -1054.247201

sum of electronic and thermal enthalpies = -1054.246127

sum of electronic and thermal free energies = -1054.330201

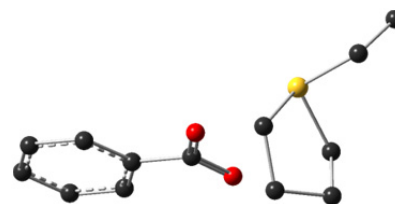

|   |             |             |             |
|---|-------------|-------------|-------------|
| C | 2.23285500  | 1.33136100  | -1.09431700 |
| H | 1.40869300  | 1.36073900  | -1.80401900 |
| H | 3.17227100  | 1.56931200  | -1.59746600 |
| C | 1.98358400  | 2.19209600  | 0.14911200  |
| H | 2.37062600  | 3.20133000  | -0.01672200 |
| H | 0.90710400  | 2.25410000  | 0.31897500  |
| C | 2.65757400  | 1.51136300  | 1.34136400  |
| H | 2.30887800  | 1.92672400  | 2.29131400  |
| H | 3.74418700  | 1.64538500  | 1.30481600  |
| C | 2.28676100  | 0.03253600  | 1.26479500  |
| H | 1.24390400  | -0.15415200 | 1.54417900  |
| H | 2.95334700  | -0.63555700 | 1.81327000  |
| C | 4.15386600  | -0.72220900 | -0.74433900 |
| H | 4.32212000  | -0.60082400 | -1.81759100 |
| H | 4.72226200  | 0.04703800  | -0.21685700 |
| S | 2.36705100  | -0.40504700 | -0.51017700 |
| C | 4.52836300  | -2.12623300 | -0.29167400 |
| H | 5.58878000  | -2.29319100 | -0.50051200 |
| H | 4.37592800  | -2.26772800 | 0.78165800  |
| H | 3.95306700  | -2.88598700 | -0.82782000 |
| C | -1.19559200 | -0.15594600 | 0.43224300  |

|   |             |             |             |
|---|-------------|-------------|-------------|
| O | -0.40317700 | 0.16636500  | -0.49613700 |
| O | -0.85940600 | -0.47401000 | 1.60352000  |
| C | -2.68382600 | -0.15773300 | 0.10701700  |
| C | -3.62128200 | -0.49282100 | 1.08613100  |
| C | -3.13412000 | 0.17368000  | -1.17254600 |
| C | -4.98289100 | -0.49599200 | 0.79450400  |
| H | -3.26632800 | -0.74982400 | 2.07839300  |
| C | -4.49462900 | 0.17135700  | -1.46962200 |
| H | -2.40284900 | 0.43261000  | -1.93070700 |
| C | -5.42328000 | -0.16388000 | -0.48567800 |
| H | -5.70176600 | -0.75817100 | 1.56588600  |
| H | -4.83153600 | 0.43087200  | -2.46950900 |
| H | -6.48513800 | -0.16623100 | -0.71545600 |

### Transition state of a ring-opening reaction between a thiolanium end group model and benzoate

electronic energy = -1054.497144 Hartree

sum of electronic and zero-point energies = -1054.239581

sum of electronic and thermal energies = -1054.216840

sum of electronic and thermal enthalpies = -1054.215766

sum of electronic and thermal free energies = -1054.298849

490.75i (cm<sup>-1</sup>)

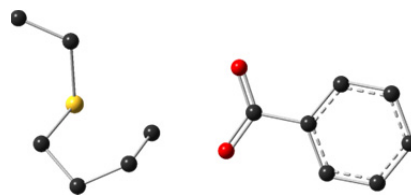

|   |             |             |             |
|---|-------------|-------------|-------------|
| C | -3.98473000 | -1.21909100 | 0.40506300  |
| H | -4.92088900 | -1.67948200 | 0.08526200  |
| H | -4.15209600 | -0.71071200 | 1.35824000  |
| C | -2.84254800 | -2.22415900 | 0.50733100  |
| C | -1.51553200 | -1.48645600 | 0.69779400  |
| H | -0.69811800 | -2.21011200 | 0.71675200  |
| H | -1.50793300 | -0.95912000 | 1.65735600  |
| C | -1.22328400 | -0.51299500 | -0.41592600 |
| H | -0.97739100 | 0.52171400  | -0.23143700 |
| H | -1.09609900 | -0.88040400 | -1.42376400 |
| H | -3.02175100 | -2.90766400 | 1.34343900  |
| H | -2.80019800 | -2.83363000 | -0.40295700 |
| C | -3.63523900 | 1.59956600  | 0.08510900  |
| H | -3.09403900 | 2.32979900  | -0.52226400 |
| H | -3.10871800 | 1.50403900  | 1.03867300  |

|   |             |             |             |
|---|-------------|-------------|-------------|
| C | 1.50067700  | 0.32770000  | -0.05737900 |
| O | 0.85760400  | -0.75180000 | -0.29226800 |
| O | 0.98113700  | 1.44564800  | 0.14033100  |
| C | 3.01089100  | 0.20749000  | -0.02062900 |
| C | 3.78982100  | 1.33358200  | 0.25166600  |
| C | 3.64101300  | -1.01590600 | -0.25684000 |
| C | 5.17800000  | 1.23978600  | 0.28883200  |
| H | 3.29251700  | 2.28033300  | 0.43309400  |
| C | 5.02938900  | -1.11266100 | -0.22107400 |
| H | 3.03192300  | -1.88782200 | -0.46862400 |
| C | 5.80093400  | 0.01544600  | 0.05218200  |
| H | 5.77498800  | 2.12189400  | 0.50212400  |
| H | 5.51037100  | -2.06882700 | -0.40662100 |
| H | 6.88429000  | -0.05923600 | 0.08051000  |
| C | -5.08376500 | 2.02330000  | 0.28286300  |
| H | -5.11246900 | 2.98327100  | 0.80819500  |
| H | -5.59583800 | 2.14182300  | -0.67606600 |
| H | -5.63944600 | 1.29688700  | 0.88329500  |
| S | -3.46704900 | 0.02580300  | -0.82210400 |

### Ground state of a thiepanium end group model and benzoate

electronic energy = -1133.098726 Hartree

sum of electronic and zero-point energies = -1132.787668

sum of electronic and thermal energies = -1132.761152

sum of electronic and thermal enthalpies = -1132.760078

sum of electronic and thermal free energies = -1132.852397

|   |             |             |             |
|---|-------------|-------------|-------------|
| C | -1.62859600 | -0.00000700 | 0.00025300  |
| O | -1.09225500 | -1.13483900 | -0.13029000 |
| O | -1.00119200 | 1.08564600  | 0.13303500  |
| C | -3.14946100 | 0.06245500  | -0.00426800 |
| C | -3.81033200 | 1.28295700  | 0.14836100  |
| C | -3.90645300 | -1.10024900 | -0.16156400 |
| C | -5.20157500 | 1.34227800  | 0.14472200  |
| H | -3.21742800 | 2.18309900  | 0.27020300  |
| C | -5.29790100 | -1.04626500 | -0.16674600 |
| H | -3.38780900 | -2.04565300 | -0.27933000 |
| C | -5.94934900 | 0.17651200  | -0.01331800 |

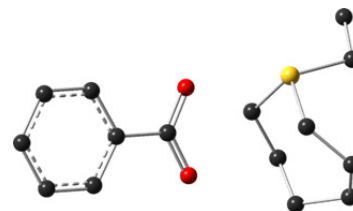

|   |             |             |             |
|---|-------------|-------------|-------------|
| H | -5.70374700 | 2.29827900  | 0.26498200  |
| H | -5.87537700 | -1.95828600 | -0.29046100 |
| H | -7.03487800 | 0.22074100  | -0.01686800 |
| C | 1.75853800  | 0.31237000  | -1.35796900 |
| C | 1.61724000  | -0.28426600 | 1.42616700  |
| C | 2.56781200  | -0.92579200 | -1.71958800 |
| H | 0.68727800  | 0.09915300  | -1.32433100 |
| H | 1.92360000  | 1.12245000  | -2.07295100 |
| C | 2.65567300  | -1.37431400 | 1.67238700  |
| H | 0.68351000  | -0.67307300 | 1.00456100  |
| H | 1.37264200  | 0.22323600  | 2.36258500  |
| C | 2.37725200  | -2.16076000 | -0.82753300 |
| H | 3.63497000  | -0.68524600 | -1.80123700 |
| H | 2.24350300  | -1.17363300 | -2.73751800 |
| C | 3.20813300  | -2.15937500 | 0.46329800  |
| H | 2.13858500  | -2.07039100 | 2.34343300  |
| H | 3.48861800  | -0.97145300 | 2.25810100  |
| H | 1.31185200  | -2.30135000 | -0.61129600 |
| H | 2.69034200  | -3.03035300 | -1.41553100 |
| H | 3.34531000  | -3.19627300 | 0.78735300  |
| H | 4.21642200  | -1.80311200 | 0.21824500  |
| S | 2.02254700  | 1.07130600  | 0.27585300  |
| C | 3.82310200  | 1.30151600  | 0.42145700  |
| H | 4.33434600  | 0.35887600  | 0.22906700  |
| H | 3.98064100  | 1.57223300  | 1.46871500  |
| C | 4.30589100  | 2.40892900  | -0.50660100 |
| H | 5.37088500  | 2.57798600  | -0.32570800 |
| H | 4.18690000  | 2.14167800  | -1.55992200 |
| H | 3.77681400  | 3.34779200  | -0.32205500 |

**Transition state of a ring-opening reaction between a thiepanium end group model and benzoate**

electronic energy = -1133.067886 Hartree

sum of electronic and zero-point energies = -1132.758210

sum of electronic and thermal energies = -1132.732161

sum of electronic and thermal enthalpies = -1132.731087

sum of electronic and thermal free energies = -1132.821319

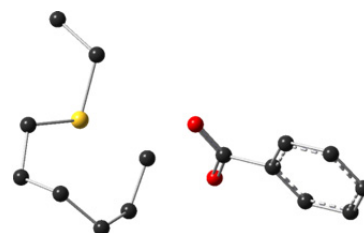

508.96i (cm<sup>-1</sup>)

|   |             |             |             |
|---|-------------|-------------|-------------|
| C | 3.14863600  | -2.19380500 | -0.16646300 |
| H | 2.61377200  | -2.71627700 | -0.96423600 |
| H | 2.52171900  | -2.22323900 | 0.72956400  |
| C | 3.88146800  | 0.37811500  | 0.76734600  |
| H | 4.96845100  | 0.27179700  | 0.75079200  |
| H | 3.49855100  | -0.16169800 | 1.63878200  |
| C | 3.49495500  | 1.85625500  | 0.85525500  |
| H | 3.79317400  | 2.38462200  | -0.05880400 |
| H | 4.11992100  | 2.27188100  | 1.65316700  |
| C | 2.01412000  | 2.11924500  | 1.18661000  |
| H | 1.95622200  | 2.93984100  | 1.90990500  |
| H | 1.60344900  | 1.24549300  | 1.70751600  |
| C | 1.10541100  | 2.49225100  | 0.00814200  |
| H | 0.07547600  | 2.54781500  | 0.37813400  |
| H | 1.36477000  | 3.49922500  | -0.34080800 |
| C | 1.14309100  | 1.55732500  | -1.20216400 |
| H | 2.06213900  | 1.70863700  | -1.77732000 |
| H | 0.32846300  | 1.81601500  | -1.88380800 |
| C | 0.99182700  | 0.09570100  | -0.87257200 |
| H | 0.88170200  | -0.61683100 | -1.67774200 |
| H | 0.80500100  | -0.25962000 | 0.12942200  |
| C | -1.68431800 | -0.25903200 | 0.11473600  |
| O | -1.10534300 | 0.16214000  | -0.94346000 |
| C | -3.19954200 | -0.26930500 | 0.08337000  |
| C | -3.89790200 | 0.16723400  | -1.04417600 |
| C | -3.91401900 | -0.71978900 | 1.19490500  |
| C | -5.28991900 | 0.15447900  | -1.06043700 |
| H | -3.33864400 | 0.51626300  | -1.90527200 |
| C | -5.30575100 | -0.73406400 | 1.18147400  |
| H | -3.36412900 | -1.05721500 | 2.06686400  |
| C | -5.99691400 | -0.29651100 | 0.05282700  |
| H | -5.82414000 | 0.49661300  | -1.94224100 |
| H | -5.85224700 | -1.08656200 | 2.05159000  |
| H | -7.08309800 | -0.30682700 | 0.04097000  |
| O | -1.10084500 | -0.65031700 | 1.14716400  |

|   |            |             |             |
|---|------------|-------------|-------------|
| C | 4.50793400 | -2.83448200 | 0.08051800  |
| H | 4.36736300 | -3.88121900 | 0.36825300  |
| H | 5.12797600 | -2.80776800 | -0.82000300 |
| H | 5.05064800 | -2.33728500 | 0.88937600  |
| S | 3.24865600 | -0.46374600 | -0.72812300 |

### cyclohexane

electronic energy = -235.735450 Hartree

sum of electronic and zero-point energies = -235.581775

sum of electronic and thermal energies = -235.573658

sum of electronic and thermal enthalpies = -235.572584

sum of electronic and thermal free energies = -235.614811

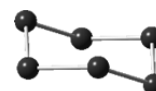

|   |             |             |             |
|---|-------------|-------------|-------------|
| C | -1.26522400 | 0.73047800  | 0.22964300  |
| C | 0.00000000  | 1.46095500  | -0.22964300 |
| C | 1.26522400  | 0.73047800  | 0.22964300  |
| C | 1.26522400  | -0.73047800 | -0.22964300 |
| C | 0.00000000  | -1.46095500 | 0.22964300  |
| C | -1.26522400 | -0.73047800 | -0.22964300 |
| H | 2.15806100  | 1.24595700  | -0.14464700 |
| H | 0.00000000  | 1.52517300  | -1.32734600 |
| H | 0.00000000  | 2.49191400  | 0.14464700  |
| H | -1.32083800 | 0.76258600  | 1.32734600  |
| H | -2.15806100 | 1.24595700  | -0.14464700 |
| H | 1.32083800  | -0.76258600 | -1.32734600 |
| H | 2.15806100  | -1.24595700 | 0.14464700  |
| H | 0.00000000  | -2.49191400 | -0.14464700 |
| H | 0.00000000  | -1.52517300 | 1.32734600  |
| H | -1.32083800 | -0.76258600 | -1.32734600 |
| H | -2.15806100 | -1.24595700 | 0.14464700  |
| H | 1.32083800  | 0.76258600  | 1.32734600  |

### cycloheptane

electronic energy = -275.013042 Hartree

sum of electronic and zero-point energies = -274.833499

sum of electronic and thermal energies = -274.824475

sum of electronic and thermal enthalpies = -274.823401

sum of electronic and thermal free energies = -274.869100

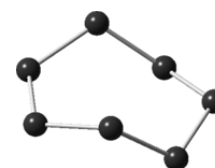



|   |             |             |             |
|---|-------------|-------------|-------------|
| C | 1.00735400  | 1.29465300  | -0.26772900 |
| C | -1.53023200 | 0.77584200  | -0.21132400 |
| C | 1.73713700  | 0.00000000  | 0.09283300  |
| H | 0.85661200  | 1.34318600  | -1.35618700 |
| H | 1.66618000  | 2.13508200  | -0.01443800 |
| C | -1.53023100 | -0.77584300 | -0.21132500 |
| H | -1.60888600 | 1.13504800  | -1.24547500 |
| H | -2.44113600 | 1.12597900  | 0.28904900  |
| C | 1.00735400  | -1.29465300 | -0.26772900 |
| H | 1.93773900  | 0.00000000  | 1.17414700  |
| H | 2.71855900  | 0.00000000  | -0.39925200 |
| C | -0.34139500 | -1.49605900 | 0.43490900  |
| H | -1.60888500 | -1.13504700 | -1.24547500 |
| H | -2.44113600 | -1.12598000 | 0.28904700  |
| H | 0.85661300  | -1.34318600 | -1.35618600 |
| H | 1.66618100  | -2.13508200 | -0.01443800 |
| H | -0.57758600 | -2.56774600 | 0.43402800  |
| H | -0.24910700 | -1.21176500 | 1.49194100  |
| C | -0.34139600 | 1.49605900  | 0.43490900  |
| H | -0.57758600 | 2.56774600  | 0.43402800  |
| H | -0.24910700 | 1.21176400  | 1.49194100  |

### cyclooctane

electronic energy = -314.283578 Hartree

sum of electronic and zero-point energies = -314.078023

sum of electronic and thermal energies = -314.067033

sum of electronic and thermal enthalpies = -314.065959

sum of electronic and thermal free energies = -314.117133

|   |             |             |             |
|---|-------------|-------------|-------------|
| C | -1.67482200 | 0.61442900  | 0.47391700  |
| C | -0.53102500 | -1.49678000 | -0.55863900 |
| C | -0.74252500 | 1.62879200  | -0.21103800 |
| H | -1.35221700 | 0.49296700  | 1.51669500  |
| H | -2.68039100 | 1.05074800  | 0.53255700  |
| H | -0.11134000 | -1.04716100 | -1.46622600 |
| H | -0.79006500 | -2.52526000 | -0.83726900 |
| C | 0.53110200  | -1.49673900 | 0.55866400  |
| C | 0.74244900  | 1.62881200  | 0.21105000  |

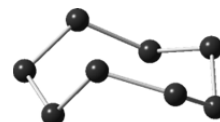

|   |             |             |             |
|---|-------------|-------------|-------------|
| H | -0.80856300 | 1.52037200  | -1.30388500 |
| H | -1.13303300 | 2.62966700  | 0.01237500  |
| C | 1.82830400  | -0.76050800 | 0.19427300  |
| H | 0.11140500  | -1.04710200 | 1.46623600  |
| H | 0.79018000  | -2.52519900 | 0.83733300  |
| C | 1.67478300  | 0.61449800  | -0.47393400 |
| H | 1.13292600  | 2.62970600  | -0.01233500 |
| H | 0.80849000  | 1.52036800  | 1.30389400  |
| H | 2.42129000  | -1.39303400 | -0.48119100 |
| H | 2.42777400  | -0.64412900 | 1.10768100  |
| H | 1.35215200  | 0.49302300  | -1.51670200 |
| H | 2.68032500  | 1.05087200  | -0.53259900 |
| C | -1.82826100 | -0.76058400 | -0.19429200 |
| H | -2.42770000 | -0.64422800 | -1.10772400 |
| H | -2.42125800 | -1.39312500 | 0.48114900  |
